# Supplementary material
Source: PubMed Central journal article supplement (PMC4571832)
Supplement: supp_3.2.E172_2014-0060-2-at.pdf [file supp_3.2.E172_2014-0060-2-at.pdf]

**Appendix 2 (as supplied by the authors): Coding definitions  
for demographic and comorbid conditions**

| Characteristics/Condition             | Database             | Codes                                                                                                                                                                                                    |
|---------------------------------------|----------------------|----------------------------------------------------------------------------------------------------------------------------------------------------------------------------------------------------------|
| Age                                   | RPDB                 |                                                                                                                                                                                                          |
| Sex                                   | RPDB                 |                                                                                                                                                                                                          |
| Socioeconomic Status                  | Statistics<br>Canada |                                                                                                                                                                                                          |
| Rural Location                        | Statistics<br>Canada |                                                                                                                                                                                                          |
| Long Term Care<br>Utilization         | ODB                  |                                                                                                                                                                                                          |
| Charlson Comorbidity<br>Index         | CIHI-DAD             |                                                                                                                                                                                                          |
| Health Care Visits                    | OHIP<br>IPDB         |                                                                                                                                                                                                          |
| Prescribing Physician                 | IPDB                 |                                                                                                                                                                                                          |
| Pancreatectomy/Pancreas<br>Transplant | CIHI-DAD<br>OHIP     | CCI: "10A85VCXXK", "10J85", "10J87",<br>"10J89", "10K58", "10K85", "10K87",<br>"10K91", "10J83"<br><br>ICD10: "T8681"<br><br>OHIP FEE: "S297", "S298", "S299",<br>"S300", "S301", "S303", "S308", "S309" |
| Gallstones/Biliary stones             | CIHI-DAD<br>OHIP     | ICD10: "K563", "K800", "K801", "K802",<br>"K803", "K804", "K805"<br><br>OHIP DX: "574"                                                                                                                   |
| Calcium disorder                      | CIHI-DAD             | ICD10: "E835"                                                                                                                                                                                            |
| Alcoholism                            | CIHI-DAD             | ICD10: "E512", "F10", "G312", "G621",<br>"G721", "I426", "K292", "K70", "K860",<br>"T510", "X45", "X65", "Y15", "Y573",<br>"Z502", "Z714", "Z721"                                                        |
| Tobacco Use                           | CIHI-DAD<br>OHIP     | ICD10: "F17", "T652", "Z587", "Z716",<br>"Z720", "Z8642"<br>OHIP DX: "305"<br>OHIP Fee: "E079", "K039", "Q041", "Q042",<br>"Q622"                                                                        |
| Pancreatic Neoplasm                   | CIHI-DAD<br>OHIP     | ICD10: "C250", "C251", "C252", "C253",<br>"C254", "C257", "C258", "C259"<br><br>OHIP DX: "157"                                                                                                           |

|                                         |                  |                                                                                                                                                                           |
|-----------------------------------------|------------------|---------------------------------------------------------------------------------------------------------------------------------------------------------------------------|
| <b>ERCP</b>                             | CIHI-DAD<br>OHIP | CCI: "10E50BA", "10E50BAAG",<br>"10E52BATS", "10E54BATS", "10J52BA",<br>"10J52BATS", "3OG10WZ"<br><br>OHIP FEE: "E662", "E668", "Z760"                                    |
| <b>Chronic Kidney Disease</b>           | CIHI-DAD<br>OHIP | ICD10: "E102", "E112", "E132", "E142",<br>"I12", "I13", "N08", "N18", "N19"<br><br>OHIP DX: "403", "585"                                                                  |
| <b>Bile Duct Neoplasm</b>               | CIHI-DAD<br>OHIP | ICD10: "C221", "C240", "C248", "C249",<br>"C787", "D015", "D135", "D376", "81600",<br>"81610", "81613"<br><br>OHIP DX: "156"                                              |
| <b>HIV</b>                              | CIHI-DAD<br>OHIP | ICD10: "B20", "B21", "B22", "B23",<br>"B24", "Z21", "C46"<br><br>OHIP DX: "042", "043", "044"                                                                             |
| <b>Systemic Lupus<br/>Erythematosis</b> | CIHI-DAD<br>OHIP | ICD10: "L93", "M32"<br><br>OHIP DX: "695"                                                                                                                                 |
| <b>Polyarteritis Nodosa</b>             | CIHI-DAD<br>OHIP | ICD10: "M300"<br><br>OHIP DX: "446"                                                                                                                                       |
| <b>Celiac Disease</b>                   | CIHI-DAD<br>OHIP | ICD10: "K900"<br><br>OHIP DX: "579"                                                                                                                                       |
| <b>Obesity</b>                          | CIHI-DAD<br>OHIP | ICD10: "E660", "E661", "E662", "E668",<br>"E669"<br><br>OHIP DX: "278"                                                                                                    |
| <b>Charlson Comorbidity<br/>Index</b>   | CIHI-DAD         |                                                                                                                                                                           |
| <b>Diabetic Retinopathy</b>             | CIHI-DAD         | ICD10: "E1030", "E1031", "E1032",<br>"E1033", "E1130", "E1131", "E1132",<br>"E1133", "E1330", "E1331", "E1332",<br>"E1333", "E1430", "E1431", "E1432",<br>"E1433", "H360" |

|                                                  |                  |                                                                                                                                                                                                                                                                                                                                                                                                     |
|--------------------------------------------------|------------------|-----------------------------------------------------------------------------------------------------------------------------------------------------------------------------------------------------------------------------------------------------------------------------------------------------------------------------------------------------------------------------------------------------|
| <b>Diabetic Neuropathy</b>                       | CIHI-DAD         | ICD10: "E1040", "E1041", "E1042", "E1048", "E1049", "E1440", "E1441", "E1442", "E1448", "E1140", "E1141", "E1142", "E1148", "E1340", "E1341", "E1342", "E1348", "E1349", "G590", "G632", "G990"                                                                                                                                                                                                     |
| <b>Peripheral Vascular Disease</b>               | CIHI-DAD<br>OHIP | ICD 10: "I700", "I702", "I708", "I709", "I731", "I738", "I739", "K551"<br><br>CCI: "1KA76", "1KA50", "1KE76", "1KG26", "1KG50", "1KG57", "1KG76MI", "1KG87"<br><br>OHIP FEE: "R787", "R780", "R797", "R804", "R809", "R875", "R815", "R936", "R783", "R784", "R785", "E626", "R814", "R786", "R937", "R860", "R861", "R855", "R856", "R933", "R934", "R791", "E672", "R794", "R813", "R867", "E649" |
| <b>Heart Failure</b>                             | CIHI-DAD<br>OHIP | ICD10: "I500", "I501", "I509", "I255", "J81"<br><br>CCI: "1HP53", "1HP55", "1HZ53GRFR", "1HZ53LAFR", "1HZ53SYFR"<br><br>OHIP FEE: "R701", "R702", "Z429"<br><br>OHIP DX: "428"                                                                                                                                                                                                                      |
| <b>Coronary Artery Bypass Graft</b>              | CIHI-DAD<br>OHIP | CCI: 1IJ50, 1IJ76<br><br>CCP: 4802, 4803, 4809, 4811, 4812, 4813, 4814, 4815, 4816, 4817, 4819<br><br>OHIP FEE: Z434, R742, R743                                                                                                                                                                                                                                                                    |
| <b>Hypertension</b>                              | ODB              |                                                                                                                                                                                                                                                                                                                                                                                                     |
| <b>Coronary Artery Disease, Excluding Angina</b> | CIHI-DAD         | ICD10: "I21", "I22", "Z955", "T822"<br><br>CCI: "1IJ50", "1IJ76"<br><br>OHIP FEE: "R741", "R742", "R743", "G298", "E646", "E651", "E652", "E654", "E655", "Z434", "Z448"<br><br>OHIP DX: "410", "412"                                                                                                                                                                                               |
| <b>Myocardial Infarction</b>                     | CIHI-DAD         | ICD9: "410"<br><br>ICD10: "I21", "I22"                                                                                                                                                                                                                                                                                                                                                              |
| <b>Stroke/Transient Ischemic Attack</b>          | CIHI-DAD         | ICD10: "I630", "I631", "I632", "I633", "I634", "I635", "I638", "I639", "I64", "H341", "I600", "I601", "I602", "I603", "I604", "I605", "I606", "I607", "I609", "I61", "G450", "G451", "G452", "G453",                                                                                                                                                                                                |

|                                              |                  |                                                                                                                                                                                                                                                                                                                                                                                                                                                                                                                                                                                                                                                                                                                       |
|----------------------------------------------|------------------|-----------------------------------------------------------------------------------------------------------------------------------------------------------------------------------------------------------------------------------------------------------------------------------------------------------------------------------------------------------------------------------------------------------------------------------------------------------------------------------------------------------------------------------------------------------------------------------------------------------------------------------------------------------------------------------------------------------------------|
|                                              |                  | "G458", "G459"                                                                                                                                                                                                                                                                                                                                                                                                                                                                                                                                                                                                                                                                                                        |
| <b>Dialysis</b>                              | CIHI-DAD<br>OHIP | ICD10: "T824", "Y602", "Y612", "Y622",<br>"Y841", "Z49", "Z992", "N180", "E1022",<br>"E1023", "E1122", "E1123", "E1322",<br>"E1323", "E1422", "E1423"<br><br>CCI: "1OT53DATS", "1OT53HATS",<br>"1OT53LATS", "1SY55LAFT", "7SC59QD",<br>"1KY76", "1PZ21"<br><br>OHIP FEE: "R850", "G324", "G336",<br>"G327", "G862", "G865", "G099", "R825",<br>"R826", "R827", "R833", "R840", "R841",<br>"R843", "R848", "R851", "Z450", "Z451",<br>"Z452", "G864", "R852", "R853", "R854",<br>"R885", "G333", "H540", "H740", "R849",<br>"G323", "G325", "G326", "G860", "G863",<br>"G866", "G330", "G331", "G332", "G861",<br>"G082", "G083", "G085", "G090", "G091",<br>"G092", "G093", "G094", "G095", "G096",<br>"G294", "G295" |
| <b>Renal Transplant</b>                      | CIHI-DAD<br>OHIP | ICD10: "T861", "N165", "Z940"<br><br>CCI: "1PC85"<br><br>OHIP FEE: "E762", "S435", "E769",<br>"S434", "E771", "Z631", "G347", "G348",<br>"G412", "G408", "                                                                                                                                                                                                                                                                                                                                                                                                                                                                                                                                                            |
| <b>Hypoglycemic Episode</b>                  | CIHI-DAD         | ICD10: "E15", "E160", "E161", "E162",<br>"E1063", "E1163", "E1363", "E1463"                                                                                                                                                                                                                                                                                                                                                                                                                                                                                                                                                                                                                                           |
| <b>Acute or Chronic<br/>Pancreatitis</b>     | CIHI-DAD         | ICD 10: "K85", "B252", "B263", "K860",<br>"K861"                                                                                                                                                                                                                                                                                                                                                                                                                                                                                                                                                                                                                                                                      |
| <b>Hyperglycemic Emergency</b>               | CIHI-DAD         | ICD10: "E1410", "E1412", "E1010",<br>"E1012", "E1110", "E1112", "E1300",<br>"E140"                                                                                                                                                                                                                                                                                                                                                                                                                                                                                                                                                                                                                                    |
| <b>Glycated Hemoglobin Value</b>             | Gamma Dynacare   |                                                                                                                                                                                                                                                                                                                                                                                                                                                                                                                                                                                                                                                                                                                       |
| <b>Number of Physician<br/>Visits</b>        | OHIP             |                                                                                                                                                                                                                                                                                                                                                                                                                                                                                                                                                                                                                                                                                                                       |
| <b>Glycated Hemoglobin Tests</b>             | OHIP             | OHIP FEE: "L093"                                                                                                                                                                                                                                                                                                                                                                                                                                                                                                                                                                                                                                                                                                      |
| <b>Glucose Tests</b>                         | OHIP             | OHIP FEE: "L111", "L112", "G002"                                                                                                                                                                                                                                                                                                                                                                                                                                                                                                                                                                                                                                                                                      |
| <b>Cholesterol Tests</b>                     | OHIP             | OHIP FEE: "G001", "G013", "L117", "Q183"                                                                                                                                                                                                                                                                                                                                                                                                                                                                                                                                                                                                                                                                              |
| <b>Thyroid Stimulating<br/>Hormone Tests</b> | OHIP             | OHIP FEE: "G016", "G399", "L341"                                                                                                                                                                                                                                                                                                                                                                                                                                                                                                                                                                                                                                                                                      |
| <b>Carotid Ultrasound</b>                    | CIHI-DAD<br>OHIP | CCI: "3JE30"<br><br>OHIP FEE: "J201", "J501", "J189",<br>"J489", "J190", "J191", "J490", "J491",<br>"J492"                                                                                                                                                                                                                                                                                                                                                                                                                                                                                                                                                                                                            |

|                                          |                  |                                                                                                                                                                                                                                                      |
|------------------------------------------|------------------|------------------------------------------------------------------------------------------------------------------------------------------------------------------------------------------------------------------------------------------------------|
| <b>Cardiac Catheterization</b>           | CIHI-DAD<br>OHIP | CCI: "3IJ30GP", "3HZ30GP", "2HZ24GPKJ",<br>"2HZ24GPKL", "2HZ24GPKM", "2HZ24GPXJ",<br>"2HZ28GPPL", "2HZ71GP"<br><br>OHIP FEE: "G296", "G297", "G299",<br>"G300", "G301", "G304", "G305", "G306"                                                       |
| <b>Coronary Revascularization</b>        | CIHI-DAD<br>OHIP | CCI: "1IJ50", "1IJ26", "1IJ27", "1IJ57",<br>"1IJ76"<br><br>OHIP FEE: "R741", "R742", "R743",<br>"E651", "E652", "E654", "E646", "G298",<br>"Z434", "G262"                                                                                            |
| <b>Echocardiography</b>                  | CIHI-DAD<br>OHIP | CCI: "3IP30"<br><br>OHIP FEE: "G560", "G561", "G562",<br>"G566", "G567", "G568", "G570", "G571",<br>"G572", "G574", "G575", "G576", "G577",<br>"G578", "G579", "G580", "G581"                                                                        |
| <b>Holter Monitor</b>                    | CIHI-DAD<br>OHIP | CCI: "2HZ24JAKH"<br><br>OHIP FEE: "G650", "G651", "G652",<br>"G653", "G654", "G655", "G656", "G657",<br>"G658", "GG59", "G660", "G661", "G682",<br>"G683", "G684", "G685", "G686", "G687",<br>"G688", "G689", "G690", "G692", "G693"                 |
| <b>Cardiac Stress Test</b>               | CIHI-DAD<br>OHIP | CCI: "2HZ08", "3IP70"<br><br>OHIP FEE: "G315", "G174", "G111",<br>"G112", "G319", "J604", "J606", "J607",<br>"J608", "J611", "J612", "J613", "J667",<br>"J807", "J808", "J809", "J804", "J811",<br>"J812", "J813", "J867", "J609", "J666",<br>"J866" |
| <b>Influenza Vaccine</b>                 | OHIP             | OHIP FEE: "G590", "G591"                                                                                                                                                                                                                             |
| <b>Colorectal Cancer Screening</b>       | OHIP             | OHIP FEE: "G004", "L179", "L181",<br>"Q043", "Q152", "X112", "X113", "Z535",<br>"Z536", "Z555", "Z580"                                                                                                                                               |
| <b>Prostate Specific Antigen Testing</b> | OHIP             | OHIP FEE: "L354", "L358"                                                                                                                                                                                                                             |
| <b>Mammography</b>                       | OHIP             | OHIP FEE: "X172", "X178", "X184",<br>"X185", "X201"                                                                                                                                                                                                  |
| <b>Diabetes Management Code</b>          | OHIP             | OHIP FEE: "K030"                                                                                                                                                                                                                                     |
| <b>Diabetes Incentive Code</b>           | OHIP             | OHIP FEE: "Q040"                                                                                                                                                                                                                                     |
| <b>Bone Mineral Density</b>              | OHIP             | OHIP FEE: "J654", "J688", "J854",                                                                                                                                                                                                                    |

|  |  |                                                                           |
|--|--|---------------------------------------------------------------------------|
|  |  | "J888", "X149", "X152", "X153", "X155",<br>"Y654", "Y688", "Y854", "Y888" |
|--|--|---------------------------------------------------------------------------|

*CCI, Canadian Classification of Health Interventions; CIHI-DAD, Canadian Institute for Health Information Discharge Abstract Database; ICD-10, International Statistical Classification of Diseases and Related Health Problems, Tenth Revision; IPDB, Institute for Clinical Evaluative Sciences Physician Database; ODB, Ontario Drug Benefits; OHIP, Ontario Health Insurance Plan; RPDB, Registered Persons Database of Ontario.*
