# Supplementary material
Source: PubMed Central journal article supplement (PMC4571832)
Supplement: supp_3.2.E172_2014-0060-4-at.pdf [file supp_3.2.E172_2014-0060-4-at.pdf]

**Appendix 4 (as supplied by the authors): Propensity score variables**

**Demographics**

Age  
Rural location  
Long term care  
Prescribing physician of relevant hypoglycemic agent

**Comorbidities \***

Chronic kidney disease  
Hypertension  
Charlson comorbidity index

**Medication use #**

Diuretic use  
Lipid lowering drug  
ACE inhibitor use  
ARB use  
Insulin use  
Gliclazide use  
Glyburide use  
Metformin use  
Rosiglitazone use

**Health care utilization ||**

Number of unique drug identifier numbers  
Number of unique drug names  
Number of hospitalizations  
Number of emergency room visits  
Number of endocrinologist visits  
Number of nephrologist visits  
Number of glycated hemoglobin tests  
Number of glucose tests  
Number of serum creatinine tests  
Number of thyroid stimulating hormone tests  
Flu vaccine  
Diabetes management code

\* Comorbidities were assessed in the previous 5 years

# Medication use was assessed in the previous 120 days

|| Health care utilization was assessed in the previous 1 year
