# Supplementary material
Source: PubMed Central journal article supplement (PMC4571832)
Supplement: supp_3.2.E172_2014-0060-5-at.pdf [file supp_3.2.E172_2014-0060-5-at.pdf]

**Appendix 5 (as supplied by the authors): Health care utilization prior to and after propensity weighting in patients initiated on sitagliptin or an alternative hypoglycemic agent**

|                                            | Prior to Weighting     |                                           |                          | After Weighting #               |                                                    |                          |
|--------------------------------------------|------------------------|-------------------------------------------|--------------------------|---------------------------------|----------------------------------------------------|--------------------------|
|                                            | Sitagliptin (n=57 689) | Alternative hypoglycemic agent (n=83 405) | Standardized difference* | Sitagliptin (Weighted n=57 689) | Alternative hypoglycemic agent (Weighted n=55 705) | Standardized difference* |
| Number of unique drug identifier numbers † |                        |                                           |                          |                                 |                                                    |                          |
| Mean                                       | 10.6                   | 8.97                                      | 28%                      | 10.6                            | 10.78                                              | 4%                       |
| SD                                         | 5.51                   | 6.22                                      |                          | 5.51                            | 4.67                                               |                          |
| Median                                     | 10                     | 8                                         |                          | 10                              | 10                                                 |                          |
| 25 <sup>th</sup> Percentile                | 7                      | 5                                         |                          | 7                               | 7                                                  |                          |
| 75 <sup>th</sup> Percentile                | 13                     | 15                                        |                          | 13                              | 14                                                 |                          |
| 0                                          | 725 (1.26)             | 4957 (5.94)                               | 25%                      | 725 (1.26)                      | 775 (1.39)                                         | 1%                       |
| 1-4                                        | 4632 (8.03)            | 15 092 (18.09)                            | 30%                      | 4632 (8.03)                     | 4678 (8.40)                                        | 1%                       |
| 5-8                                        | 17 181 (29.78)         | 24 599 (29.49)                            | 1%                       | 17 181 (29.78)                  | 15 977 (28.68)                                     | 2%                       |
| 9-12                                       | 17 849 (30.94)         | 19 091 (22.89)                            | 18%                      | 17 849 (30.94)                  | 16 536 (29.68)                                     | 3%                       |
| 12-15                                      | 8001 (13.87)           | 8460 (10.14)                              | 11%                      | 8001 (13.87)                    | 8000 (14.36)                                       | 1%                       |
| >16                                        | 9301 (16.21)           | 11 206 (13.44)                            | 8%                       | 9301 (16.12)                    | 9738 (17.48)                                       | 4%                       |
| Number of unique drug names †              |                        |                                           |                          |                                 |                                                    |                          |
| Mean                                       | 9.56                   | 8                                         | 32%                      | 9.56                            | 9.69                                               | 3%                       |
| SD                                         | 4.65                   | 5.2                                       |                          | 4.65                            | 3.94                                               |                          |
| Median                                     | 9                      | 7                                         |                          | 9                               | 9                                                  |                          |
| 25 <sup>th</sup> Percentile                | 6                      | 4                                         |                          | 6                               | 6                                                  |                          |
| 75 <sup>th</sup> Percentile                | 12                     | 11                                        |                          | 12                              | 12                                                 |                          |
| 0                                          | 725 (1.26)             | 4957 (5.94)                               | 25%                      | 725 (1.26)                      | 775 (1.39)                                         | 1%                       |
| 1-4                                        | 5284 (9.16)            | 16 787 (20.13)                            | 31%                      | 5284 (9.16)                     | 5363 (9.63)                                        | 2%                       |
| 5-8                                        | 20 344 (35.26)         | 27 678 (33.19)                            | 4%                       | 20 344 (35.26)                  | 18 882 (33.90)                                     | 3%                       |
| 9-12                                       | 18 377 (31.86)         | 19 284 (23.12)                            | 20%                      | 18 377 (31.86)                  | 17 236 (30.94)                                     | 2%                       |
| 12-15                                      | 7042 (12.21)           | 7641 (9.16)                               | 10%                      | 7042 (12.21)                    | 7151 (12.84)                                       | 2%                       |
| >16                                        | 5917 (10.26)           | 7058 (8.46)                               | 6%                       | 5917 (10.26)                    | 6298 (11.31)                                       | 3%                       |
| Health care use                            |                        |                                           |                          |                                 |                                                    |                          |
| Number of any hospitalization              |                        |                                           |                          |                                 |                                                    |                          |
| Mean                                       | 0.17                   | 0.25                                      | 13%                      | 0.17                            | 0.19                                               | 4%                       |
| SD                                         | 0.54                   | 0.68                                      |                          | 0.54                            | 0.46                                               |                          |

|                                       |                   |                   |     |                   |                   |    |
|---------------------------------------|-------------------|-------------------|-----|-------------------|-------------------|----|
| Median                                | 0                 | 0                 |     | 0                 | 0                 |    |
| 25th Percentile                       | 0                 | 0                 |     | 0                 | 0                 |    |
| 75th Percentile                       | 0                 | 0                 |     | 0                 | 0                 |    |
| 0                                     | 50 874<br>(88.19) | 69 546<br>(83.38) | 14% | 50 874<br>(88.19) | 48 013<br>(86.19) | 6% |
| 1                                     | 4954 (8.59)       | 9561<br>(11.46)   | 10% | 4954 (8.59)       | 5647<br>(10.14)   | 5% |
| 2                                     | 1270 (2.20)       | 2748<br>(3.29)    | 7%  | 1270 (2.20)       | 1468<br>(2.64)    | 3% |
| >=3                                   | 591 (1.02)        | 1550<br>(1.86)    | 7%  | 591 (1.02)        | 577<br>(1.04)     | 0% |
| Number of emergency room visits       |                   |                   |     |                   |                   |    |
| Mean                                  | 0.55              | 0.72              | 12% | 0.55              | 0.6               | 4% |
| SD                                    | 1.28              | 1.5               |     | 1.28              | 1.01              |    |
| Median                                | 0                 | 0                 |     | 0                 | 0                 |    |
| 25th Percentile                       | 0                 | 0                 |     | 0                 | 0                 |    |
| 75th Percentile                       | 1                 | 1                 |     | 1                 | 1                 |    |
| 0                                     | 40 910<br>(70.91) | 54 459<br>(65.29) | 12% | 40 910<br>(70.91) | 37 731<br>(67.73) | 7% |
| 1                                     | 9734<br>(16.87)   | 15 573<br>(18.67) | 5%  | 9734<br>(16.87)   | 10 372<br>(18.62) | 5% |
| 2                                     | 3700 (6.41)       | 6510<br>(7.81)    | 5%  | 3700 (6.41)       | 4034<br>(7.24)    | 3% |
| >=3                                   | 3345 (5.80)       | 6863<br>(8.23)    | 10% | 3345 (5.80)       | 3569<br>(6.41)    | 3% |
| Number of general practitioner visits |                   |                   |     |                   |                   |    |
| Mean                                  | 9.78              | 10.21             | 4%  | 9.78              | 9.8               | 0% |
| SD                                    | 8.38              | 11.87             |     | 8.38              | 7.32              |    |
| Median                                | 8                 | 7                 |     | 8                 | 8                 |    |
| 25th Percentile                       | 5                 | 4                 |     | 5                 | 5                 |    |
| 75th Percentile                       | 12                | 12                |     | 12                | 12                |    |
| 0                                     | 1218 (2.11)       | 3242<br>(3.89)    | 10% | 1218 (2.11)       | 1468<br>(2.64)    | 3% |
| 1                                     | 1418 (2.46)       | 3537<br>(4.24)    | 10% | 1418 (2.46)       | 1560<br>(2.80)    | 2% |
| 2                                     | 2344 (4.06)       | 4719<br>(5.66)    | 7%  | 2344 (4.06)       | 2384<br>(4.28)    | 1% |
| >=3                                   | 52 709<br>(91.37) | 71 907<br>(86.21) | 16% | 52 709<br>(91.37) | 50 293<br>(90.28) | 4% |
| Number of endocrinologist visits      |                   |                   |     |                   |                   |    |
| Mean                                  | 0.32              | 0.22              | 9%  | 0.32              | 0.34              | 2% |
| SD                                    | 1.06              | 1.14              |     | 1.06              | 1                 |    |
| Median                                | 0                 | 0                 |     | 0                 | 0                 |    |
| 25th Percentile                       | 0                 | 0                 |     | 0                 | 0                 |    |
| 75th Percentile                       | 0                 | 0                 |     | 0                 | 0                 |    |
| 0                                     | 49 228<br>(85.33) | 75 945<br>(91.06) | 18% | 49 228<br>(85.33) | 47 358<br>(85.02) | 1% |
| 1                                     | 3398 (5.89)       | 3457<br>(4.14)    | 8%  | 3398 (5.89)       | 3605<br>(6.47)    | 2% |
| 2                                     | 2609 (4.52)       | 1911<br>(2.29)    | 12% | 2609 (4.52)       | 2348<br>(4.22)    | 2% |
| >=3                                   | 2454 (4.25)       | 2092<br>(2.51)    | 10% | 2454 (4.25)       | 2393<br>(4.30)    | 0% |

|                                             |                   |                   |     |                   |                   |    |
|---------------------------------------------|-------------------|-------------------|-----|-------------------|-------------------|----|
| Number of nephrologist visits               |                   |                   |     |                   |                   |    |
| Mean                                        | 0.23              | 0.51              | 8%  | 0.23              | 0.28              | 3% |
| SD                                          | 2.12              | 4.29              |     | 2.12              | 1.65              |    |
| Median                                      | 0                 | 0                 |     | 0                 | 0                 |    |
| 25th Percentile                             | 0                 | 0                 |     | 0                 | 0                 |    |
| 75th Percentile                             | 0                 | 0                 |     | 0                 | 0                 |    |
| 0                                           | 52 827<br>(91.57) | 75 493<br>(90.51) | 4%  | 52 827<br>(91.57) | 50 209<br>(90.13) | 5% |
| 1                                           | 2393 (4.15)       | 3476<br>(4.17)    | 0%  | 2393 (4.15)       | 2534<br>(4.55)    | 2% |
| 2                                           | 1275 (2.21)       | 1892<br>(2.27)    | 0%  | 1275 (2.21)       | 1490<br>(2.67)    | 3% |
| 3                                           | 1194 (2.07)       | 2544<br>(3.05)    | 6%  | 1194 (2.07)       | 1472<br>(2.64)    | 4% |
| Number of gastro-<br>enterologist<br>visits |                   |                   |     |                   |                   |    |
| Mean                                        | 0.19              | 0.23              | 4%  | 0.19              | 0.23              | 4% |
| SD                                          | 0.96              | 1.28              |     | 0.96              | 0.86              |    |
| Median                                      | 0                 | 0                 |     | 0                 | 0                 |    |
| 25th Percentile                             | 0                 | 1                 |     | 0                 | 0                 |    |
| 75th Percentile                             | 0                 | 0                 |     | 0                 | 0                 |    |
| 0                                           | 52 637<br>(91.24) | 75 695<br>(90.76) | 2%  | 52 637<br>(91.24) | 50 171<br>(90.07) | 4% |
| 1                                           | 2438 (4.23)       | 3628<br>(4.35)    | 1%  | 2438 (4.23)       | 2598<br>(4.66)    | 2% |
| 2                                           | 1291 (2.24)       | 1828<br>(2.19)    | 0%  | 1291 (2.24)       | 1363<br>(2.45)    | 1% |
| 3                                           | 1323 (2.29)       | 2254<br>(2.70)    | 3%  | 1323 (2.29)       | 1573<br>(2.82)    | 3% |
| Number of<br>ophthalmologist<br>visits      |                   |                   |     |                   |                   |    |
| Mean                                        | 1.08              | 0.92              | 7%  | 1.08              | 1.1               | 1% |
| SD                                          | 2.3               | 2.13              |     | 2.3               | 1.91              |    |
| Median                                      | 0                 | 0                 |     | 0                 | 0                 |    |
| 25th Percentile                             | 0                 | 0                 |     | 0                 | 0                 |    |
| 75th Percentile                             | 1                 | 1                 |     | 1                 | 1                 |    |
| 0                                           | 36 786<br>(63.77) | 57 776<br>(69.27) | 12% | 36 786<br>(63.77) | 35 506<br>(63.74) | 0% |
| 1                                           | 8735<br>(15.14)   | 10 626<br>(12.74) | 7%  | 8735<br>(15.14)   | 8527<br>(15.31)   | 0% |
| 2                                           | 4367 (7.57)       | 5282<br>(6.33)    | 5%  | 4367 (7.57)       | 4022<br>(7.22)    | 1% |
| 3                                           | 7801<br>(13.52)   | 9721<br>(11.66)   | 6%  | 7801<br>(13.52)   | 7650<br>(13.73)   | 1% |
| Number of<br>internist visits               |                   |                   |     |                   |                   |    |
| Mean                                        | 0.88              | 1.09              | 7%  | 0.88              | 0.94              | 2% |
| SD                                          | 2.65              | 3.62              |     | 2.65              | 2.4               |    |
| Median                                      | 0                 | 0                 |     | 0                 | 0                 |    |
| 25th Percentile                             | 0                 | 0                 |     | 0                 | 0                 |    |
| 75th Percentile                             | 1                 | 1                 |     | 1                 | 1                 |    |
| 0                                           | 41 733<br>(72.34) | 60 445<br>(72.47) | 0%  | 41 733<br>(72.34) | 40 129<br>(72.04) | 1% |
| 1                                           | 6926              | 9728              | 1%  | 6926              | 6882              | 1% |

|                                             |                |                |     |                |                |    |
|---------------------------------------------|----------------|----------------|-----|----------------|----------------|----|
|                                             | (12.01)        | (11.66)        |     | (12.01)        | (12.35)        |    |
| 2                                           | 3116 (5.40)    | 4098 (4.91)    | 2%  | 3116 (5.40)    | 2927 (5.25)    | 1% |
| 3                                           | 5914 (10.25)   | 9134 (10.95)   | 2%  | 5914 (10.25)   | 5768 (10.35)   | 0% |
| Number of glycosylated hemoglobin tests     |                |                |     |                |                |    |
| Mean                                        | 10.48          | 7.8            | 43% | 10.48          | 10.7           | 4% |
| SD                                          | 6.34           | 6.06           |     | 6.34           | 5.51           |    |
| Median                                      | 10             | 7              |     | 10             | 10             |    |
| 0                                           | 1368 (2.37)    | 5927 (7.11)    | 22% | 1368 (2.37)    | 1686 (3.03)    | 4% |
| 1-2                                         | 3349 (5.81)    | 12 197 (14.62) | 29% | 3349 (5.81)    | 3316 (5.95)    | 1% |
| 3-4                                         | 5043 (8.74)    | 11 688 (14.01) | 17% | 5043 (8.74)    | 4797 (8.61)    | 0% |
| >4                                          | 47 929 (83.08) | 53 593 (64.26) | 44% | 47 929 (83.08) | 45 907 (82.41) | 2% |
| Number of glucose tests                     |                |                |     |                |                |    |
| Mean                                        | 12.36          | 9.6            | 30% | 12.36          | 12.38          | 0% |
| SD                                          | 9.78           | 8.36           |     | 9.78           | 8.2            |    |
| Median                                      | 11             | 8              |     | 11             | 11             |    |
| 0                                           | 1282 (2.22)    | 4416 (5.29)    | 16% | 1282 (2.22)    | 1620 (2.91)    | 4% |
| 1-2                                         | 2753 (4.77)    | 7631 (9.15)    | 17% | 2753 (4.77)    | 2693 (4.83)    | 0% |
| 3-4                                         | 4315 (7.48)    | 9819 (11.77)   | 15% | 4315 (7.48)    | 4229 (7.59)    | 0% |
| >4                                          | 49 339 (85.53) | 61 539 (73.78) | 29% | 49 339 (85.53) | 47 163 (84.67) | 2% |
| Number of creatinine tests                  |                |                |     |                |                |    |
| Mean                                        | 10.54          | 9              | 21% | 10.54          | 10.73          | 3% |
| SD                                          | 7.24           | 7.63           |     | 7.24           | 6.19           |    |
| Median                                      | 9              | 7              |     | 9              | 9              |    |
| 0                                           | 1178 (2.04)    | 4165 (4.99)    | 16% | 1178 (2.04)    | 1420 (2.55)    | 3% |
| 1-2                                         | 2847 (4.94)    | 8060 (9.66)    | 18% | 2847 (4.94)    | 2737 (4.91)    | 0% |
| 3-4                                         | 5377 (9.32)    | 11 099 (13.31) | 13% | 5377 (9.32)    | 5192 (9.32)    | 0% |
| >4                                          | 48 287 (83.70) | 60 081 (72.04) | 28% | 48 287 (83.70) | 46 355 (83.22) | 1% |
| Number of lipid tests                       |                |                |     |                |                |    |
| Mean                                        | 7.43           | 5.84           | 35% | 7.43           | 7.24           | 4% |
| SD                                          | 4.75           | 4.3            |     | 4.75           | 3.93           |    |
| Median                                      | 7              | 5              |     | 7              | 6              |    |
| 0                                           | 1847 (3.20)    | 6504 (7.80)    | 20% | 1847 (3.20)    | 2237 (4.02)    | 4% |
| 1-2                                         | 5128 (8.89)    | 13 137 (15.75) | 21% | 5128 (8.89)    | 5162 (9.27)    | 1% |
| 3-4                                         | 50 714 (87.91) | 63 764 (76.45) | 30% | 50 714 (87.91) | 48 306 (86.72) | 4% |
| Number of thyroid stimulating hormone tests |                |                |     |                |                |    |
| Mean                                        | 4.82           | 4.18           | 17% | 4.82           | 4.77           | 1% |
| SD                                          | 3.88           | 3.65           |     | 3.88           | 3.34           |    |

| Median                            | 4                 | 3                 |     | 4                 | 4                 |    |
|-----------------------------------|-------------------|-------------------|-----|-------------------|-------------------|----|
| 0                                 | 4781 (8.29)       | 10 033<br>(12.03) | 12% | 4781 (8.29)       | 5236<br>(9.40)    | 4% |
| 1-2                               | 12 462<br>(21.60) | 21 610<br>(25.91) | 10% | 12 462<br>(21.60) | 12 482<br>(22.41) | 2% |
| 3-4                               | 40 446<br>(70.11) | 51 762<br>(62.06) | 17% | 40 446<br>(70.11) | 37 986<br>(68.19) | 4% |
| Carotid<br>ultrasound             | 9358<br>(16.22)   | 13 505<br>(16.19) | 0%  | 9358<br>(16.22)   | 9472<br>(17.00)   | 2% |
| Cardiac<br>catheterization        | 5037 (8.73)       | 6909<br>(8.28)    | 2%  | 5037 (8.73)       | 5065<br>(9.09)    | 1% |
| Coronary<br>revascularization     | 3000 (5.20)       | 4280<br>(5.13)    | 0%  | 3000 (5.20)       | 3068<br>(5.51)    | 1% |
| Echocardiography                  | 27 738<br>(48.08) | 38 656<br>(46.35) | 3%  | 27 738<br>(48.08) | 26 551<br>(47.66) | 1% |
| Holter monitoring                 | 11 059<br>(19.17) | 15 445<br>(18.52) | 2%  | 11 059<br>(19.17) | 10 490<br>(18.83) | 1% |
| Cardiac stress<br>test            | 23 137<br>(40.11) | 30 200<br>(36.21) | 8%  | 23 137<br>(40.11) | 22 232<br>(39.91) | 0% |
| Influenza vaccine                 | 46 035<br>(79.80) | 61 324<br>(73.53) | 15% | 46 035<br>(79.80) | 44 662<br>(80.18) | 1% |
| Colorectal cancer<br>screening    | 36 721<br>(63.65) | 48 271<br>(57.88) | 12% | 36 721<br>(63.65) | 35 512<br>(63.75) | 0% |
| Prostate specific<br>antigen test | 7875<br>(13.65)   | 10 403<br>(12.47) | 3%  | 7875<br>(13.65)   | 7279<br>(13.07)   | 2% |
| Mammography                       | 10 204<br>(17.69) | 13 221<br>(15.85) | 5%  | 10 204<br>(17.69) | 9369<br>(16.82)   | 2% |
| Diabetes<br>management §          | 31 928<br>(55.35) | 36 713<br>(44.02) | 23% | 31 928<br>(55.35) | 31 902<br>(57.27) | 4% |
| Diabetes<br>incentive ¶           | 31 057<br>(53.84) | 35 608<br>(42.69) | 22% | 31 057<br>(53.84) | 30 491<br>(54.74) | 2% |
| Bone mineral<br>density test      | 17 129<br>(29.69) | 22 387<br>(26.84) | 6%  | 17 129<br>(29.69) | 15 681<br>(28.15) | 3% |

Data presented as number (percent) with the exception of number of investigations and health care visits (presented as mean, median, 25<sup>th</sup> percentile, 75<sup>th</sup> percentile, SD standard deviation).

Cell sizes less than six were not reported for reasons of privacy.

#All patients identified prior to weighting were included in the analyses. The number of patients indicated represents a weighted total.

\*Standardized differences are less sensitive to sample size than traditional hypothesis tests. They provide a measure of the difference between groups divided by the pooled standard deviation; a value greater than 10% (0.1) is interpreted as a meaningful difference between the groups.

†Prescribed medication use was assessed in the 120 days prior to the index date.

||Health care use was assessed in the 1 year previous.

§Diabetes management is an all-inclusive service payable to the most responsible physician for providing continuing management and support of a diabetic patient. The service must include assessments focusing on diabetic target organ systems, relevant counseling and maintenance of a diabetic flow sheet retained on the patient's permanent medical record. The flow sheet must track lipids, cholesterol, HbA1C, urinalysis, blood pressure, fundal examination, peripheral vascular examination, weight, BMI and medication dosage. See Schedule of benefits for physician services under the health insurance act - consultations and visits. A1-128. Available from: [http://www.health.gov.on.ca/english/providers/program/ohip/sob/physerv/a\\_consul.pdf](http://www.health.gov.on.ca/english/providers/program/ohip/sob/physerv/a_consul.pdf). Accessed 12/30, 2013. ¶Diabetes management incentive is a fee rendered to a general practitioner providing ongoing management of a diabetic patient consistent with the requirements of the Canadian Diabetes Association including a minimum of lipid, HbA1C, blood pressure, BMI measurement, albumin:creatinine, preventative measures and health promotion, referral for dilated eye exam, foot and neurological exam over the previous 12 months. See Schedule of benefits for physician services under the health insurance act - consultations and visits. A1-128. Available from: [http://www.health.gov.on.ca/english/providers/program/ohip/sob/physerv/a\\_consul.pdf](http://www.health.gov.on.ca/english/providers/program/ohip/sob/physerv/a_consul.pdf). Accessed 12/30, 2013.
