# Supplementary material
Source: PubMed Central journal article supplement (PMC4571832)
Supplement: supp_3.2.E172_2014-0060-6-at.pdf [file supp_3.2.E172_2014-0060-6-at.pdf]

**Appendix 6 (as supplied by the authors): Ninety-day risk of a hospital encounter with acute pancreatitis for patients accrued after June 2011**

| Exposure                       | Weighted Number of Patients (N) | Events |       | Odds Ratio          |         |
|--------------------------------|---------------------------------|--------|-------|---------------------|---------|
|                                |                                 | N      | %     | Odds Ratio (95% CI) | p-value |
| Sitagliptin                    | 72 804                          | 43     | 0.06% | 0.67 (0.35 to 1.29) | 0.2306  |
| Alternative hypoglycemic agent | 72 655                          | 64     | 0.09% |                     |         |

Patients prescribed glyburide, gliclazide, metformin or insulin served as the referent group.

Abbreviations: confidence interval (CI).

All patients identified prior to weighting were included in the analysis. The number of patients indicated represents a weighted total.
