# Supplementary material
Source: PubMed Central journal article supplement (PMC4571832)
Supplement: supp_3.2.E172_2014-0060-7-at.pdf [file supp_3.2.E172_2014-0060-7-at.pdf]

Appendix 7 (as supplied by the authors): Proportion of sitagliptin and alternative hypoglycemic agent users with at least one amylase or lipase test during 90 days of follow-up

| Test                         | Weighted % of sitagliptin users (unweighted %) | Weighted % of alternative hypoglycemic agent users (unweighted %) |
|------------------------------|------------------------------------------------|-------------------------------------------------------------------|
| Serum amylase or lipase test | 0.90% (0.90%)                                  | 0.86% (0.85%)                                                     |
