# Supplementary material
Source: PubMed Central journal article supplement (PMC4571832)
Supplement: supp_3.2.E172_2014-0060-8-at.pdf [file supp_3.2.E172_2014-0060-8-at.pdf]

**Appendix 8 (as supplied by the authors): Proportion of new sitagliptin, sulfonylurea, metformin and insulin users with acute pancreatitis at 90 days**

| Outcome                                    | Weighted % of sitagliptin users (unweighted %) | Weighted % of sulfonylurea users (unweighted %) | Weighted % of metformin users (unweighted %) | Weighted % of insulin users (unweighted %) |
|--------------------------------------------|------------------------------------------------|-------------------------------------------------|----------------------------------------------|--------------------------------------------|
| Hospital encounter with acute pancreatitis | 0.08% (0.08%)                                  | 0.08% (0.09%)                                   | 0.08% (0.08%)                                | 0.13% (0.15%)                              |
