# Supplementary material
Source: PubMed Central journal article supplement (PMC4571832)
Supplement: supp_3.2.E172_2014-0060-9-at.pdf [file supp_3.2.E172_2014-0060-9-at.pdf]

**Appendix 9 (as supplied by the authors): Proportion of sitagliptin and alternative hypoglycemic agent monotherapy and combination therapy users with acute pancreatitis at 90 days**

| Outcome                                    | Weighted % of sitagliptin monotherapy users (unweighted %) | Weighted % of alternative hypoglycemic agent monotherapy users (unweighted %) | Weighted % of sitagliptin combination therapy users* (unweighted %) | Weighted % of alternative hypoglycemic agent combination therapy users* (unweighted %) |
|--------------------------------------------|------------------------------------------------------------|-------------------------------------------------------------------------------|---------------------------------------------------------------------|----------------------------------------------------------------------------------------|
| Hospital encounter with acute pancreatitis | 0.06% (0.06%)                                              | 0.09% (0.10%)                                                                 | 0.09% (0.09%)                                                       | 0.09% (0.10%)                                                                          |

\*Combination therapy users were those who had at least one additional prescription for a hypoglycemic agent (ie a prescription apart from the study drug) which overlapped with the index date.
