# Supplementary material
Source: PubMed Central journal article supplement (PMC4571832)
Supplement: supp_3.2.E172_2014-0060_original_submission.pdf [file supp_3.2.E172_2014-0060_original_submission.pdf]

1  
2  
3 **Sitagliptin, pancreatitis and older adults: a population-**  
4 **based cohort study**  
5  
6

7 Kristin K. Clemens, MD <sup>1</sup>; Eric McArthur, MSc <sup>2</sup>; Jamie L.  
8 Fleet, BHSc <sup>1,2</sup>; Irene Hramiak, MD <sup>3</sup>; Amit X. Garg, MD, PhD  
9  
10  
11 <sup>1,2,4</sup>

- 12  
13 1. Department of Medicine, Western University, London,  
14 Canada
- 15  
16 2. Institute for Clinical Evaluative Sciences, Ontario,  
17 Canada
- 18  
19 3. Division of Endocrinology, Department of Medicine,  
20 Western University, London, Canada
- 21  
22 4. Department of Epidemiology and Biostatistics, Western  
23 University, London, Canada
- 24  
25  
26  
27  
28  
29  
30  
31

32 **Correspondence:** Dr. Kristin Clemens, London Kidney Clinical  
33 Research Unit, Room ELL-101, London Health Sciences Centre,  
34 800 Commissioners Road East, London, Ontario, Canada N6A  
35 4G5, Tel: 519-685-8502, Fax: 519-685-8072, email:  
36 kclemens2008@meds.uwo.ca  
37  
38  
39  
40  
41  
42  
43

44 **Publication Type:** Research article

45  
46 **Word Count:** 2624

47  
48 **Date:** April 11, 2014  
49  
50  
51  
52  
53  
54  
55  
56  
57  
58  
59  
60

**Abstract**

**Background:** The risk of pancreatitis with sitagliptin in routine care remains to be established in elderly patients with type 2 diabetes.

**Methods:** In a population-based retrospective cohort study of older adults in Ontario from 2010 until 2012, we studied those who were newly prescribed sitagliptin (n=57 689) or an alternative hypoglycemic agent to sitagliptin (metformin, glyburide, gliclazide or insulin; n=83 405) in the outpatient setting. Our primary outcome was a hospital encounter (emergency room visit or hospitalization) with acute pancreatitis assessed within 90 days of a new prescription for the relevant hypoglycemic agent. We used inverse probability of treatment weighting to balance the two groups in the analysis.

**Results:** There were no significant differences in 68 measured baseline characteristics and 34 medications between the sitagliptin and the alternative hypoglycemic agent group. A prescription for sitagliptin was not associated with an increased risk of a hospital encounter with pancreatitis compared with a prescription for an alternative hypoglycemic agent (weighted total 46 of 57 689 sitagliptin users [0.08%] vs 48 of 55 705 alternative hypoglycemic agent

1  
2  
3 users [0.09%], absolute risk difference -0.01% [95% CI -  
4 0.05%-0.02%], odds ratio [OR] 0.92 [95% CI 0.55-1.55]).  
5  
6  
7

8  
9 **Interpretation:** Older adults who were prescribed sitagliptin  
10 in routine care were not at a substantially higher risk of  
11 acute pancreatitis compared with those prescribed  
12 alternative oral hypoglycemic agents. These findings are  
13 reassuring for those who use or prescribe sitagliptin in the  
14 management of type 2 diabetes.  
15  
16  
17  
18  
19  
20  
21  
22  
23  
24  
25  
26  
27  
28  
29  
30  
31  
32  
33  
34  
35  
36  
37  
38  
39  
40  
41  
42  
43  
44  
45  
46  
47  
48  
49  
50  
51  
52  
53  
54  
55  
56  
57  
58  
59  
60

Confidential

## Introduction

Sitagliptin, a dipeptidyl peptidase-4 (DPP-4) inhibitor, reduces blood glucose by blocking the breakdown of glucagon-like peptide-1 (GLP-1), an incretin hormone that stimulates insulin secretion in a glucose-dependent fashion. [1]

Because of its relative potency (decreases glycated hemoglobin by up to 1% as monotherapy) and low risk of hypoglycemia, [2] sitagliptin use has increased significantly over recent years (there were over 700 000 prescriptions for sitagliptin in Ontario alone from June 2010 to June 2012). [3]

Despite its benefits, DPP-4 inhibitor use has been linked with pancreatitis in case reports, animal studies and post-marketing drug surveillance studies. It has been postulated that sitagliptin might promote pancreatitis by increasing the mass of the pancreas, modifying enzyme secretion, disturbing acinar architecture, promoting pancreatic inflammation, or increasing ductal turnover and ductal metaplasia. [4, 5] As pancreatitis can be a significant cause of morbidity and mortality, warnings of the association have been published by regulatory agencies, pharmaceutical companies and diabetes association guidelines (pancreatitis warnings outlined in eTable 1 of the Supplement).

1  
2  
3 However, in real-practice observational studies, the link  
4 between DPP-4 inhibitor use and pancreatitis has been  
5 inconsistently described and studies have been limited in  
6 their collection of baseline covariates, drug use and health  
7 care utilization. [6, 7] Further, there has been a reliance  
8 on self-reported outcomes, [6, 8, 9] and studies have often  
9 been limited to younger populations, making results less  
10 generalizable to the elderly. [7, 10] In the current study  
11 we aimed to examine the risk of acute pancreatitis with  
12 sitagliptin use in routine care in a large, representative  
13 population of older adults in Ontario, Canada.  
14  
15  
16  
17  
18  
19  
20  
21  
22  
23  
24  
25  
26  
27

## 28 **Methods**

### 31 *Study Design and Setting*

32 We conducted a population-based retrospective cohort study  
33 of older adults from June 2010 to December 2012 using linked  
34 health care databases in Ontario, Canada. Ontario has  
35 approximately 1.8 million adults aged 65 years or older who  
36 have comprehensive universal healthcare. This includes  
37 coverage for outpatient prescription medications, physician  
38 services, hospitalizations and diagnostic testing. [11]  
39  
40  
41  
42  
43  
44  
45  
46  
47  
48  
49

50 The study was conducted at the Institute for Clinical  
51 Evaluative Sciences (ICES) according to a pre-specified  
52 protocol that was approved by the research ethics board at  
53 Sunnybrook Health Sciences Centre (Toronto, Canada). This  
54  
55  
56  
57  
58  
59  
60

1  
2  
3 board waived informed consent. The reporting of the study  
4 follows guidelines for the reporting of observational  
5 studies (checklist of recommendations in eTable 2 of the  
6 Supplement). [12]  
7  
8  
9  
10

### 11 12 13 *Data Sources*

14 We obtained patient characteristics, drug use, covariate  
15 information, and outcome data using records from five  
16 databases. We ascertained vital statistics from the  
17 Registered Persons Database of Ontario, which contains  
18 demographic information on all Ontario residents who have  
19 been issued a health card. The Ontario Drug Benefit Program  
20 database was used to identify prescription drug use. This  
21 database contains accurate records of all outpatient  
22 prescriptions dispensed to those aged 65 years or older,  
23 with an error rate of less than 1%. [13] Diagnostic and  
24 procedural information on hospitalizations and emergency  
25 room visits were abstracted from the Canadian Institute for  
26 Health Information's Discharge Abstract Database and the  
27 National Ambulatory Care Reporting System database,  
28 respectively. Covariate information was derived from the  
29 Ontario Health Insurance Plan database, which includes  
30 health claims for inpatient and outpatient physician  
31 services. We used the ICES Physician Database to abstract  
32 hypoglycemic agent prescriber information. In several  
33 previous studies, we have used these databases to research  
34 adverse drug events and health outcomes. [14-18] A  
35  
36  
37  
38  
39  
40  
41  
42  
43  
44  
45  
46  
47  
48  
49  
50  
51  
52  
53  
54  
55  
56  
57  
58  
59  
60

1  
2  
3 subpopulation in Southwestern Ontario had outpatient  
4  
5 glycated hemoglobin measurements available before a new  
6  
7 hypoglycemic agent prescription. [19]  
8  
9

10  
11 With the exception of prescriber information (missing in  
12  
13 approximately 9.6% in the study), and income quintile  
14  
15 (missing in approximately 0.4% of the study) the databases  
16  
17 were complete for all variables used. *International*  
18  
19 *Classification of Diseases 10th revision (ICD-10; post-2002)*  
20  
21 and *Canadian Classification of Health Interventions (CCI;*  
22  
23 *post-2002)* codes were utilized to assess baseline  
24  
25 comorbidities and investigations in the five years prior to  
26  
27 the hypoglycemic agent prescription (coding definitions  
28  
29 listed in eTable 3 in the Supplement). Codes used to assess  
30  
31 the outcome of acute pancreatitis and their validity are  
32  
33 detailed in eTable 4 in the Supplement.  
34  
35  
36  
37

### 38 *Patient Selection*

39  
40 Patient selection is presented in eFigure 1 and eFigure 2 in  
41  
42 the Supplement. To mimic routine practice, we studied older  
43  
44 adults newly prescribed sitagliptin or an alternative  
45  
46 hypoglycemic agent to sitagliptin (metformin, glyburide,  
47  
48 gliclazide or insulin) between June 2010 and December 2012.  
49  
50 The date of their hypoglycemic drug prescription served as  
51  
52 the index date (referred to as the cohort entry date or  
53  
54 start time for follow-up).  
55  
56  
57  
58  
59  
60

1  
2  
3 In the sitagliptin group we excluded the following patients  
4 from the analysis: 1) those in their first year of  
5 eligibility for prescription drug coverage (aged 65 years)  
6 to avoid incomplete medication records, 2) those with  
7 evidence of a hospital discharge in the two days prior to or  
8 on the index date to ensure these were new sitagliptin  
9 prescriptions (because in Ontario patients continuing a  
10 medication initiated in hospital would have their medication  
11 dispensed on the same day or the day after hospital  
12 discharge), 3) those who had evidence of a code for  
13 anesthesia or an epidural in the 30 days prior to the index  
14 date to exclude those with a recent surgery, a risk factor  
15 for pancreatitis, 4) those with evidence of a pancreas  
16 transplant or pancreatectomy in the five years prior to the  
17 index date, to exclude those with previous surgical  
18 manipulation of the pancreas, 5) those with a prescription  
19 for one or more DPP-4 inhibitors in the one year prior (to  
20 define new use), 6) those prescribed saxagliptin (an  
21 alternative DPP-4 inhibitor) or a sitagliptin-metformin  
22 combination pill (to restrict to sitagliptin use only).  
23  
24  
25  
26  
27  
28  
29  
30  
31  
32  
33  
34  
35  
36  
37  
38  
39  
40  
41  
42  
43  
44  
45

46 In those prescribed an alternate hypoglycemic agent we  
47 excluded patients from analysis for similar reasons as in  
48 the sitagliptin cohort, with differences as follows: we  
49 excluded 1) those initiated on metformin without evidence of  
50 a code for diabetes in the Ontario Diabetes Database [20] as  
51 diabetes itself is a risk factor for pancreatitis and  
52  
53  
54  
55  
56  
57  
58  
59  
60



1  
2  
3 metformin can be prescribed for indications other than  
4 diabetes), [6, 7] 2) those with a prescription for the same  
5 alternative hypoglycemic agent in the one year prior (to  
6 define new use), 3) those with a prescription for a DPP-4  
7 inhibitor in the one year prior (to compare mutually  
8 exclusive groups). In both the sitagliptin and alternative  
9 hypoglycemic agent groups, a patient could enter the cohort  
10 only once.  
11  
12  
13  
14  
15  
16  
17  
18  
19

### 20 21 22 *Outcomes*

23  
24 The outcome was a hospital encounter (emergency room visit  
25 or hospital admission) with acute pancreatitis (diagnostic  
26 codes and their validation presented in eTable 4 in the  
27 Supplement). In the primary analysis the outcome was  
28 assessed within 90 days of the index date. We chose 90 days  
29 of follow-up to avoid crossover in drug therapy that could  
30 occur with longer periods of follow up, and because  
31 prescriptions covered by Ontario's drug plan are prescribed  
32 at no more than 100-day intervals.  
33  
34  
35  
36  
37  
38  
39  
40  
41  
42  
43

### 44 45 *Statistical Analysis*

46 We compared baseline characteristics between the sitagliptin  
47 and the alternative hypoglycemic agent group using  
48 standardized differences. This metric describes differences  
49 between group means relative to the pooled standard  
50 deviation and is considered a meaningful difference if  
51 greater than 10%. [21]  
52  
53  
54  
55  
56  
57  
58  
59  
60

1  
2  
3  
4  
5 The propensity score was derived from a logistic regression  
6 model with 29 baseline covariates incorporated into the  
7 score based on prior recommended methods (variables listed  
8 in eTable 5 in the Supplement). [22] Inverse probability of  
9 treatment weights (IPTW) were calculated using the  
10 propensity model to create a sample in which the  
11 distribution of measured baseline covariates was independent  
12 of treatment assignment. [22]  
13  
14  
15  
16  
17  
18  
19  
20  
21  
22  
23

24 For the referent group, we considered older adults  
25 prescribed an alternative hypoglycemic agent to sitagliptin  
26 (metformin, glyburide, gliclazide, or insulin). We expressed  
27 the risk for developing acute pancreatitis in both relative  
28 and absolute terms. To calculate odds ratios and 95%  
29 confidence intervals, a logistic regression model was fit  
30 using a robust variance estimate, accounting for IPTW.  
31  
32  
33  
34  
35  
36  
37  
38  
39

40 We conducted all analyses with SAS version 9.3 (SAS  
41 Institute, Cary, North Carolina). This includes additional  
42 analyses we undertook after knowledge of the primary results  
43 (see Results section). In all outcome analyses we  
44 interpreted 2-tailed  $p$  values lower than 0.05 as  
45 statistically significant.  
46  
47  
48  
49  
50  
51  
52  
53  
54

## 55 **Results**

56  
57  
58  
59  
60

### *Baseline Characteristics*

We identified 57 689 patients initiated on sitagliptin and 83 405 patients initiated on an alternative hypoglycemic agent. The baseline characteristics of the two groups before and after propensity weighting are presented in Table 1 and in eTable 6 and eTable 7 of the Supplement. After weighting, we had weighted totals of 57 689 in the sitagliptin group and 55 705 in the alternative hypoglycemic agent group, and characteristics were similar between the groups (with standardized differences less than 10% for 68 characteristics and 34 medications).

### *Outcomes*

Results for the primary outcome of pancreatitis are presented in Table 2. Prescribing sitagliptin was not associated with a higher 90-day risk of a hospital encounter with pancreatitis compared with prescribing an alternative hypoglycemic agent (weighted total 46 of 57 689 sitagliptin users [0.08%] vs 48 of 55 705 alternative hypoglycemic agent users [0.09%], absolute risk difference -0.01% [95% CI -0.05%-0.02%], odds ratio [OR] 0.92 [95% CI 0.55-1.55],  $p=0.76$ ).

### *Additional Analysis*

We conducted a time to event analysis and our findings remained robust. Specifically, we extended the follow-up beyond 90 days, terminating the observation period for

1  
2  
3 reasons of death, study hypoglycemic agent discontinuation,  
4 receipt of a non-study hypoglycemic agent, or the last date  
5 of available records (March 31, 2013) (details presented in  
6 eTable 8 of the Supplement). Prescribing sitagliptin was not  
7 associated with a higher risk of a hospital encounter with  
8 acute pancreatitis compared with prescribing an alternative  
9 hypoglycemic agent (Cox proportional hazards model with  
10 IPTW; hazard ratio [HR] 1.18 [95% CI 0.94-1.49],  $p=0.15$ ).

## 21 **Discussion**

### 22 *Study Findings*

23  
24 In our study of older adults, the initiation of sitagliptin  
25 was not associated with a higher 90-day risk of hospital  
26 encounters with acute pancreatitis compared with the  
27 initiation of metformin, glyburide, gliclazide or insulin in  
28 routine care.  
29  
30  
31  
32  
33  
34  
35  
36  
37  
38  
39

### 40 *Results in Relation to Other Studies*

41  
42 The findings of our routine practice study are consistent  
43 with the results of randomized controlled trials. In a  
44 systematic review and meta-analysis of the risk of  
45 pancreatitis with DPP-4 inhibitor use in patients with type  
46 2 diabetes (109 studies of 26 732 DPP-4 inhibitor users and  
47 18 507 individuals using placebo or alternative hypoglycemic  
48 agents), Monami et al noted no increase in the incidence of  
49 pancreatitis in DPP-4 inhibitor users (20 of 11 553 DPP-4  
50  
51  
52  
53  
54  
55  
56  
57  
58  
59  
60

1  
2  
3 inhibitor users vs 16 of 8973 placebo/alternative  
4  
5 hypoglycemic agent users; adjusted odds ratio [OR] 0.93 [CI  
6  
7 0.52-1.69],  $p=0.83$ ). [23] In a recent study of patients with  
8  
9 type 2 diabetes (mean age 65 years) randomized to  
10  
11 saxagliptin (a DPP-4 inhibitor) or placebo and followed for  
12  
13 a median of 2.1 years for cardiovascular outcomes, in  
14  
15 secondary analysis, rates of adjudicated cases of acute  
16  
17 pancreatitis were similar in both groups (22 of 8280  
18  
19 saxagliptin users [0.3%] vs 16 of 8212 placebo users [0.2%],  
20  
21  $p=0.42$ ). [24]  
22  
23

24  
25  
26 Our results are also consistent with a smaller active drug  
27  
28 surveillance study of adults and older adults which noted  
29  
30 that in 16 276 initiators of sitagliptin and 16 281 matched  
31  
32 initiators of metformin or glyburide, the risk of acute  
33  
34 pancreatitis was comparable (RR 1.0 [95% CI 0.5-2.0]). [25]  
35  
36 Recognizing that their study excluded older adults and that  
37  
38 they collected fewer baseline characteristics, we also note  
39  
40 similar findings to a population-based cohort study of  
41  
42 adults which found that when compared with those prescribed  
43  
44 a new sulphonylurea, biguanide or thiazolidendione,  
45  
46 sitagliptin or exenatide (a GLP-1 agonist) use was not  
47  
48 associated with a higher risk of acute pancreatitis  
49  
50 (adjusted HR 1.0 [95% CI 0.7-1.3]). [7]  
51  
52

53  
54  
55 Our results do differ from other published studies that  
56  
57 report a higher risk of pancreatitis with sitagliptin use. A  
58  
59  
60

1  
2  
3 United States Food and Drug Administration database (U.S.  
4 FDA) study of patient or physician reported adverse events  
5 from 2004–2009 noted that users of sitagliptin or exanatide  
6 had a higher odds of pancreatitis (OR 6.74 [95% CI 4.61–10],  
7  $p < 0.0001$ ) compared with users of rosiglitazone, nateglinide,  
8 repaglinide, and glipizide. [6] In an additional U.S. FDA  
9 study, the odds of pancreatitis in DPP-4 inhibitor users was  
10 found to be 20.8 times (95% CI 12.6–34.5) the odds of  
11 pancreatitis in users of other hypoglycemic agents in an  
12 adjusted analysis. [8] A recent study of serious adverse  
13 events reported to the French Pharmacovigilance system noted  
14 that the rate of exposure to incretin-based drugs was higher  
15 in cases of pancreatitis vs non-cases of pancreatitis (67  
16 DPP-4 inhibitor users in 147 cases of pancreatitis vs 421  
17 DPP-4 inhibitor users in 2962 non-cases of pancreatitis;  
18 adjusted reporting OR 12.1 [95% CI 7.3–20.0],  $p < 0.0001$ ).  
19 These studies however may have been subject to reporting  
20 bias as events were self-reported and there is no certainty  
21 that the reported event was due to the product itself.  
22 Reporting results may also have been inflated by external  
23 factors. [6, 9]

24  
25  
26  
27  
28  
29  
30  
31  
32  
33  
34  
35  
36  
37  
38  
39  
40  
41  
42  
43  
44  
45  
46  
47  
48 In an additional study, Singh et al using a case-control  
49 design found that the adjusted odds of acute pancreatitis in  
50 those who were currently (OR 2.24 [95% CI 1.36–3.68]) and  
51 who had recently used a DPP-4 inhibitor was higher (OR 2.01  
52 [95% CI 1.37–3.18]) than those who had not. [10] This study  
53  
54  
55  
56  
57  
58  
59  
60

1  
2  
3 performed a more limited assessment of baseline covariates  
4 and health care utilization indices, and as it was completed  
5 in a younger population, may not be fully generalizable to  
6  
7  
8  
9  
10 older adults (mean age 52 years).

### 11 12 13 *Strengths and Limitations*

14  
15 Our study has several strengths. Using a large,  
16  
17 representative sample of elderly patients who use  
18  
19 sitagliptin in a routine setting (with multiple  
20  
21 comorbidities, and on multiple medications), our study  
22  
23 complements information generated from randomized clinical  
24  
25 trials by studying an uncommon but significant adverse drug  
26  
27 reaction with adequate statistical power and inclusive of  
28  
29 patients not enrolled in randomized clinical trials.  
30  
31

32  
33  
34 Compared with previous observational studies we accounted  
35  
36 for a number of confounders including baseline comorbidities  
37  
38 and medications associated with acute pancreatitis and  
39  
40 comprehensively examined health care utilization,  
41  
42 investigations and concomitant hypoglycemic drug  
43  
44 prescriptions in both groups. Using propensity weighting, we  
45  
46 were able to balance the two groups on 68 characteristics  
47  
48 and 34 medications.  
49

50  
51  
52 Further, our new-user design allowed us to observe outcomes  
53  
54 after the initiation of treatment. Where previous studies  
55  
56 included self-reported pancreatitis, in our study  
57  
58  
59  
60

1  
2  
3 pancreatitis was documented in hospital records by the  
4  
5 treating health care team. Additionally, to echo routine  
6  
7 care and make our findings interpretable in clinical  
8  
9 practice, we studied patients who were newly prescribed  
10  
11 current hypoglycemic alternatives to sitagliptin as a  
12  
13 comparison group (metformin, a sulphonylurea or insulin).  
14  
15

16  
17  
18 Our study does have some limitations. Prospective data  
19  
20 collection with independent outcome adjudication is a  
21  
22 preferred methodology to a retrospective database study. We  
23  
24 were also not able to detect asymptomatic pancreatitis or  
25  
26 pancreatitis that did not result in a hospital presentation,  
27  
28 although such outcomes are less severe hospital encounters  
29  
30 for pancreatitis. We were further only able to accurately  
31  
32 ascertain medications dispensed with no information on  
33  
34 medication use.  
35  
36

37  
38 As in previous studies, the statistical power of our study  
39  
40 warrants attention. Given the low event rate of pancreatitis  
41  
42 in both our sitagliptin and alternative hypoglycemic agent  
43  
44 groups we were able to rule out a greater than 1.7-fold  
45  
46 increase in the risk of pancreatitis in new users of  
47  
48 sitagliptin compared with the alternative hypoglycemic agent  
49  
50 group with adequate statistical power (upper bound of the  
51  
52 confidence interval). We could not rule out a smaller  
53  
54 increase in risk. Also, the limited number of events also  
55  
56 precluded meaningful subgroup analysis.  
57  
58  
59  
60



1  
2  
3  
4  
5  
6  
7  
8  
9  
10  
11  
12  
13  
14  
15  
16  
17  
18  
19  
20  
21  
22  
23  
24  
25  
26  
27  
28  
29  
30  
31  
32  
33  
34  
35  
36  
37  
38  
39  
40  
41  
42  
43  
44  
45  
46  
47  
48  
49  
50  
51  
52  
53  
54  
55  
56  
57  
58  
59  
60

Confounding is an additional consideration in all observational studies and in the current study we had limited information on factors including obesity, body mass index, and smoking status which are known to influence the risk of pancreatitis. However, using propensity score weighting we obtained good balance on a large number of measured baseline characteristics between the two groups.

### *Conclusions*

In older adults, the initiation of sitagliptin did not result in a higher risk of a hospital encounter with pancreatitis compared with an alternative diabetic medication (any of metformin, glyburide, gliclazide or insulin). These findings are reassuring for those who use or prescribe sitagliptin in the management of type 2 diabetes.

1  
2  
3  
4  
5  
6 **Authors Contributions:** EM was responsible for the  
7  
8 acquisition of data and the study analysis. KC drafted the  
9  
10 manuscript. All authors contributed to the conception and  
11  
12 design of the work, its interpretation, revised the  
13  
14 manuscript critically for important intellectual content,  
15  
16 gave final approval of the version to be published and agree  
17  
18 to act as guarantor of the work. AG and EM had full access  
19  
20 to the data and take responsibility for the integrity of the  
21  
22 data and the accuracy of the data analysis.  
23

24  
25 **Conflict of Interest Disclosures:** AG received an  
26  
27 investigator-initiated grant from Astellas and Roche to  
28  
29 support a Canadian Institutes of Health Research study in  
30  
31 living kidney donors, and his institution received  
32  
33 unrestricted research funding unrelated to this project from  
34  
35 Pfizer. No other disclosures were reported.  
36

37  
38 **Financial Disclosures:** This project was conducted at the  
39  
40 Institute for Clinical Evaluative Sciences (ICES) Western  
41  
42 Site. ICES is funded by an annual grant from the Ontario  
43  
44 Ministry of Health and Long-term Care. ICES Western is  
45  
46 funded by an operating grant from the Academic Medical  
47  
48 Organization of Southwestern Ontario. KC participated in the  
49  
50 ICES Western Faculty Scholars Program, which received  
51  
52 research funding from the Program of Experimental Medicine  
53  
54 in the Department of Medicine at Western University.  
55  
56  
57  
58  
59  
60

1  
2  
3 **Role of the Sponsor:** The sponsors had no role in the design  
4 and conduct of the study; collection, management, analysis,  
5 and interpretation of the data; preparation, review, or  
6 approval of the manuscript; and decision to submit the  
7 manuscript for publication.  
8  
9

10  
11  
12  
13 **Disclaimer:** The opinions, results, and conclusions are those  
14 of the authors, and no endorsement by the Institute for  
15 Clinical Evaluative Sciences, Ontario Ministry of Health and  
16 Long-Term Care, or Academic Medical Organization of  
17 Southwestern Ontario is intended or should be inferred.  
18  
19

20  
21  
22  
23 **Additional Contributions:** We thank Brogan Inc, Ottawa, for  
24 use of its drug product and therapeutic class database. We  
25 thank Gamma Dynacare for their use of the outpatient  
26 laboratory database and the team at London Health Sciences  
27 Centre, St Joseph's Health Care, and the Thames Valley  
28 Hospitals for providing access to the Cerner laboratory  
29 database. We thank Salimah Shariff, PhD (from ICES Western  
30 in London, Canada), for administrative support. Written  
31 permission has been obtained for her naming.  
32  
33  
34  
35  
36  
37  
38  
39  
40  
41  
42  
43  
44  
45  
46  
47  
48  
49  
50  
51  
52  
53  
54  
55  
56  
57  
58  
59  
60

1  
2  
3  
4  
5  
6  
7  
8  
9  
10  
11  
12  
13  
14  
15  
16  
17  
18  
19  
20  
21  
22  
23  
24  
25  
26  
27  
28  
29  
30  
31  
32  
33  
34  
35  
36  
37  
38  
39  
40  
41  
42  
43  
44  
45  
46  
47  
48  
49

**Table 1: Key baseline characteristics prior to and after propensity weighting in patients initiated on sitagliptin or an alternative hypoglycemic agent.**

|                                                                       | Prior to Weighting     |                  |                          | After Weighting #               |                           |                          |
|-----------------------------------------------------------------------|------------------------|------------------|--------------------------|---------------------------------|---------------------------|--------------------------|
|                                                                       | Sitagliptin (n=57 689) | Other (n=83 405) | Standardized Difference* | Sitagliptin (Weighted n=57 689) | Other (Weighted n=55 705) | Standardized Difference* |
| Mean age at index date                                                | 73.98 (6.25)           | 75.07 (6.93)     | 17%                      | 73.98 (6.25)                    | 74.07 (5.2)               | 2%                       |
| Female                                                                | 27 584 (47.82)         | 40 312 (48.33)   | 1%                       | 27 584 (47.82)                  | 26 279 (47.18)            | 1%                       |
| Comorbidities                                                         |                        |                  |                          |                                 |                           |                          |
| Gallstones/ biliary stones                                            | 2163 (3.75)            | 3152 (3.78)      | 0%                       | 2163 (3.75)                     | 2059 (3.70)               | 0%                       |
| Calcium disorder                                                      | 123 (0.21)             | 273 (0.33)       | 2%                       | 123 (0.21)                      | 154 (0.28)                | 1%                       |
| Alcoholism                                                            | 240 (0.42)             | 659 (0.79)       | 5%                       | 240 (0.42)                      | 338 (0.61)                | 3%                       |
| ERCP                                                                  | 281 (0.49)             | 561 (0.67)       | 2%                       | 281 (0.49)                      | 334 (0.60)                | 2%                       |
| Charlson cormorbidity index score \$                                  | 1.13                   | 1.22             | 5%                       | 1.13                            | 1.23                      | 7%                       |
| Pancreatitis                                                          | 216 (0.37)             | 467 (0.56)       | 3%                       | 216 (0.37)                      | 267 (0.48)                | 2%                       |
| Medications ##                                                        |                        |                  |                          |                                 |                           |                          |
| Diuretics                                                             | 18 516 (32.10)         | 28 090 (33.68)   | 3%                       | 18 516 (32.10)                  | 18 644 (33.47)            | 3%                       |
| Anti-inflammatory                                                     | 10 816 (18.75)         | 13 157 (15.77)   | 8%                       | 10 816 (18.75)                  | 10 268 (18.43)            | 1%                       |
| Glucocorticoids                                                       | 11 297 (19.58)         | 16 121 (19.33)   | 1%                       | 11 297 (19.58)                  | 11 350 (20.38)            | 2%                       |
| Sulphonamides                                                         | 859 (1.49)             | 1647 (1.97)      | 4%                       | 859 (1.49)                      | 1029 (1.85)               | 3%                       |
| Lipid lowering drugs                                                  | 43 829 (75.97)         | 51 532 (61.79)   | 31%                      | 43 829 (75.97)                  | 42 210 (75.77)            | 0%                       |
| Estrogen therapy                                                      | 601 (1.04)             | 886 (1.06)       | 0%                       | 601 (1.04)                      | 689 (1.24)                | 2%                       |
| Omeprazole                                                            | 2343 (4.06)            | 3519 (4.22)      | 1%                       | 2343 (4.06)                     | 2639 (4.74)               | 3%                       |
| Hypoglycemic agents prescribed in the 120 days prior to index date ** |                        |                  |                          |                                 |                           |                          |
| Insulin                                                               | 4505 (7.81)            | 3164 (3.79)      | 17%                      | 4505 (7.81)                     | 4091 (7.34)               | 2%                       |
| Gliclazide                                                            | 17 142 (29.71)         | 4566 (5.47)      | 67%                      | 17 142 (29.71)                  | 14 734 (26.45)            | 7%                       |
| Glyburide                                                             | 13 807 (23.93)         | 12 681 (15.20)   | 22%                      | 13 807 (23.93)                  | 14 847 (26.65)            | 6%                       |
| Metformin                                                             | 43 135 (74.77)         | 20 987 (25.16)   | 14%                      | 43 135 (74.77)                  | 41 592 (74.66)            | 0%                       |

|                |                 |             |     |                  |                  |    |
|----------------|-----------------|-------------|-----|------------------|------------------|----|
| Pioglitazone   | 5812<br>(10.07) | 1863 (2.23) | 33% | 5812<br>(10.07)  | 5949 (10.68)     | 2% |
| Repaglinde     | 341 (0.59)      | 194 (0.23)  | 6%  | 341 (0.59)       | 228 (0.41)       | 3% |
| Rosiglitazone  | 2015 (3.49)     | 524 (0.63)  | 20% | 2015 (3.49)      | 1956 (3.51)      | 0% |
| Hemoglobin Alc |                 |             |     | 0.077<br>(0.013) | 0.078<br>(0.012) | 8% |

Full table of demographics, comorbidities, medications, laboratory data and health care utilization available in eTable 6 and eTable 7 of the Supplement.

Data presented as number (percent) with the exception of age which is presented as mean (SD), Charlson comorbidity score (mean) and hemoglobin Alc which is presented as mean (SD).

Abbreviations: ERCP endoscopic retrograde cholangiopancreatography.

Cell sizes less than six were not reported for reasons of privacy.

# All patients identified prior to weighting were included in the analyses. The number of patients indicated represents a weighted total.

\* Standardized differences are less sensitive to sample size than traditional hypothesis tests. They provide a measure of the difference between groups divided by the pooled standard deviation; a value greater than 10% (0.1) is interpreted as a meaningful difference between the groups.

§ Charlson Comorbidity Index was calculated using five years of hospitalization data. "No hospitalizations" received a score of 0. [26]

|| Comorbidities were assessed by administrative database codes in the previous five years.

## Baseline medication use was assessed in the previous 120 days.

\*\* Hypoglycemic agent use in the previous 120 days includes hypoglycemic drugs prescribed from -120 to -1 day prior to the index date where days supply covered the prescription date.

Table 2: Ninety-day risk of a hospital encounter with acute pancreatitis

|                                            | Number of Events (%)          |                                                  | Absolute Risk Difference (%) (95% CI) | Odds ratio (95% CI) |
|--------------------------------------------|-------------------------------|--------------------------------------------------|---------------------------------------|---------------------|
|                                            | Sitagliptin Weighted n=57 689 | Alternative hypoglycemic agent Weighted n=55 705 |                                       |                     |
| Hospital encounter with acute pancreatitis | 46 (0.08)                     | 48.26 (0.09)                                     | -0.01% (-0.05-0.02)                   | 0.92 (0.53-1.61)    |

Patients prescribed glyburide, gliclazide, metformin or insulin served as the referent group.

Abbreviations: confidence interval (CI).

All patients identified prior to weighting were included in the analysis. The number of patients indicated represents a weighted total.

## References

1. Engel SS, Williams-Herman DE, Golm GT, Clay RJ, Machotka SV, Kaufman KD, et al. Sitagliptin: Review of preclinical and clinical data regarding incidence of pancreatitis. *Int J Clin Pract*. 2010 Jun;64(7):984-90.
2. Januvia Sitagliptin tablets 25mg, 50mg, 100mg. Merck Sharp & Dohme Limited; 2013. Available from: [http://www.merck.ca/assets/en/pdf/products/JANUVIA-PM\\_E.pdf](http://www.merck.ca/assets/en/pdf/products/JANUVIA-PM_E.pdf). Accessed 03/13, 2014.
3. IMS/brogan [homepage on the Internet].2014. Available from: [http://www.imshealth.com/portal/site/imshealth?CURRENT\\_LOCALE=en\\_ca](http://www.imshealth.com/portal/site/imshealth?CURRENT_LOCALE=en_ca). Accessed 03/13, 2014
4. Matveyenko AV, Dry S, Cox HI, Moshtaghian A, Gurlo T, Galasso R, et al. Beneficial endocrine but adverse exocrine effects of sitagliptin in the human islet amyloid polypeptide transgenic rat model of type 2 diabetes: Interactions with metformin. *Diabetes*. 2009 Jul;58(7):1604-15.
5. Koehler JA, Baggio LL, Lamont BJ, Ali S, Drucker DJ. Glucagon-like peptide-1 receptor activation modulates pancreatitis-associated gene expression but does not modify the susceptibility to experimental pancreatitis in mice. *Diabetes*. 2009 Sep;58(9):2148-61.
6. Elashoff M, Matveyenko AV, Gier B, Elashoff R, Butler PC. Pancreatitis, pancreatic, and thyroid cancer with glucagon-

- 1  
2  
3 like peptide-1-based therapies. *Gastroenterology*. 2011  
4 Jul;141(1):150-6.  
5  
6  
7 7. Garg R, Chen W, Pendergrass M. Acute pancreatitis in type  
8 2 diabetes treated with exenatide or sitagliptin: A  
9 retrospective observational pharmacy claims analysis.  
10 *Diabetes Care*. 2010 Nov;33(11):2349-54.  
11  
12  
13 8. Moore T, Cohen M, Furberg C. ISMP QuarterWatch:  
14 Perspectives on GLP-1 agents for diabetes. 2013. Available  
15 from: <http://www.ismp.org/quarterwatch/pdfs/2012Q3.pdf>.  
16 Accessed 04/11, 2014.  
17  
18  
19 9. Faillie JL, Babai S, Crepin S, Bres V, Laroche ML, Le  
20 Louet H, et al. Pancreatitis associated with the use of GLP-  
21 1 analogs and DPP-4 inhibitors: A case/non-case study from  
22 the french pharmacovigilance database. *Acta Diabetol*. 2013  
23 Dec 19.  
24  
25  
26 10. Singh S, Chang HY, Richards TM, Weiner JP, Clark JM,  
27 Segal JB. Glucagon like peptide 1-based therapies and risk  
28 of hospitalization for acute pancreatitis in type 2 diabetes  
29 mellitus: A population-based matched case-control study.  
30 *JAMA Intern Med*. 2013 Apr 8;173(7):534-9.  
31  
32  
33 11. Bronskill S, Carter M, Costa A, Esensoy A, Gill SS,  
34 Gruneir A, et al. Aging in Ontario: An ICES chartbook of  
35 health service use by older adults. Toronto: Institute for  
36 Clinical Evaluative Sciences; 2010. Available from:  
37 [http://www.ices.on.ca/Publications/Atlases-and-](http://www.ices.on.ca/Publications/Atlases-and-Reports/2010/Aging-in-Ontario.aspx)  
38 [Reports/2010/Aging-in-Ontario.aspx](http://www.ices.on.ca/Publications/Atlases-and-Reports/2010/Aging-in-Ontario.aspx). Accessed 03/13, 2014  
39  
40  
41  
42  
43  
44  
45  
46  
47  
48  
49  
50  
51  
52  
53  
54  
55  
56  
57  
58  
59  
60



- 1  
2  
3 12. von Elm E, Altman DG, Egger M, Pocock SJ, Gotsche PC,  
4 Vandembroucke JP, et al. The strengthening the reporting of  
5 observational studies in epidemiology (STROBE) statement:  
6 Guidelines for reporting observational studies. *Prev Med*.  
7 2007 Oct;45(4):247-51.  
8  
9  
10  
11  
12  
13 13. Levy AR, O'Brien BJ, Sellors C, Grootendorst P, Willison  
14 D. Coding accuracy of administrative drug claims in the  
15 Ontario drug benefit database. *Can J Clin Pharmacol*. 2003  
16 Summer;10(2):67-71.  
17  
18  
19  
20  
21  
22 14. Patel AM, Shariff S, Bailey DG, Juurlink DN, Gandhi S,  
23 Mamdani M, et al. Statin toxicity from macrolide antibiotic  
24 coprescription: A population-based cohort study. *Ann Intern*  
25 *Med*. 2013 Jun 18;158(12):869-76.  
26  
27  
28  
29  
30  
31 15. Siddiqui NF, Coca SG, Devereaux PJ, Jain AK, Li L, Luo  
32 J, et al. Secular trends in acute dialysis after elective  
33 major surgery--1995 to 2009. *CMAJ*. 2012 Aug 7;184(11):1237-  
34 45.  
35  
36  
37  
38 16. Shih AW, Weir MA, Clemens KK, Yao Z, Gomes T, Mamdani  
39 MM, et al. Oral bisphosphonate use in the elderly is not  
40 associated with acute kidney injury. *Kidney Int*. 2012  
41 Oct;82(8):903-8.  
42  
43  
44  
45  
46 17. Zhao YY, Weir MA, Manno M, Cordy P, Gomes T, Hackam DG,  
47 et al. New fibrate use and acute renal outcomes in elderly  
48 adults: A population-based study. *Ann Intern Med*. 2012 Apr  
49 17;156(8):560-9.  
50  
51  
52  
53  
54 18. Gandhi S, Fleet JL, Bailey DG, McArthur E, Wald R,  
55 Rehman F, et al. Calcium-channel blocker-clarithromycin drug  
56  
57  
58  
59  
60

1  
2  
3 interactions and acute kidney injury. JAMA. 2013 Dec  
4  
5 18;310(23):2544-53.

6  
7 19. Gandhi S, Shariff SZ, Beyea MM, Weir MA, Hands T, Kearns  
8  
9 G, et al. Identifying geographical regions serviced by  
10  
11 hospitals to assess laboratory-based outcomes. BMJ Open.  
12  
13 2013 Jan 3;3(1):10.1136/bmjopen,2012-001921.

14  
15 20. Hux JE, Ivis F, Flintoft V, Bica A. Diabetes in ontario:  
16  
17 Determination of prevalence and incidence using a validated  
18  
19 administrative data algorithm. Diabetes Care. 2002  
20  
21 Mar;25(3):512-6.

22  
23 21. Austin P. Using the standardized difference to compare  
24  
25 the prevalence of a binary variable between two groups in  
26  
27 observational studies. Commun Stat Simulat. 2009;38(6):1228.

28  
29 22. Austin PC. An introduction to propensity score methods  
30  
31 for reducing the effects of confounding in observational  
32  
33 studies. Multivariate Behav Res. 2011 May;46(3):399-424.

34  
35 23. Monami M, Dicembrini I, Mannucci E. Dipeptidyl  
36  
37 peptidase-4 inhibitors and pancreatitis risk: A meta-  
38  
39 analysis of randomized clinical trials. Diabetes Obes Metab.  
40  
41 2014 Jan;16(1):48-56.

42  
43 24. Scirica BM, Braunwald E, Bhatt DL. Saxagliptin,  
44  
45 alogliptin, and cardiovascular outcomes. N Engl J Med. 2014  
46  
47 Jan 30;370(5):483-4.

48  
49 25. Dore DD, Seeger JD, Arnold Chan K. Use of a claims-based  
50  
51 active drug safety surveillance system to assess the risk of  
52  
53 acute pancreatitis with exenatide or sitagliptin compared to  
54  
55

1  
2  
3 metformin or glyburide. *Curr Med Res Opin.* 2009

4  
5 Apr;25(4):1019-27.

6  
7 26. Charlson ME, Pompei P, Ales KL, MacKenzie CR. A new  
8  
9 method of classifying prognostic comorbidity in longitudinal  
10  
11 studies: Development and validation. *J Chronic Dis.*

12  
13 1987;40(5):373-83.  
14  
15  
16  
17  
18  
19  
20  
21  
22  
23  
24  
25  
26  
27  
28  
29  
30  
31  
32  
33  
34  
35  
36  
37  
38  
39  
40  
41  
42  
43  
44  
45  
46  
47  
48  
49  
50  
51  
52  
53  
54  
55  
56  
57  
58  
59  
60

Preprint

**Supplementary Online Content**

eTable 1. Pancreatitis warnings

eTable 2. Checklist of recommendations for reporting of observational studies using the STROBE guidelines

eTable 3. Coding definitions for demographic and co-morbid conditions

eTable 4. Coding definitions for hospital presentation with pancreatitis

eTable 5. Propensity score variables

eTable 6. Demographics, comorbidities, medications and laboratory data prior to and after propensity weighting in patients initiated on sitagliptin or an alternative hypoglycemic agent

eTable 7. Health care utilization prior to and after propensity weighting in patients initiated on sitagliptin or an alternative hypoglycemic agent

eTable 8. Time to event analysis

eFigure 1. Flow diagram representing sitagliptin group inclusions and exclusions

eFigure 2. Flow diagram representing alternative hypoglycemic agent group inclusions and exclusions

**eTable 1. DPP-4 inhibitor and pancreatitis warnings**

|                                               |                                                                                                                                                                                                                                                                                                                                                                                                                                                                                                                                                                                                                                                                                                                                                                                                                                                                                                                                                                                                                                                                                                                                                                                                                                                                     |
|-----------------------------------------------|---------------------------------------------------------------------------------------------------------------------------------------------------------------------------------------------------------------------------------------------------------------------------------------------------------------------------------------------------------------------------------------------------------------------------------------------------------------------------------------------------------------------------------------------------------------------------------------------------------------------------------------------------------------------------------------------------------------------------------------------------------------------------------------------------------------------------------------------------------------------------------------------------------------------------------------------------------------------------------------------------------------------------------------------------------------------------------------------------------------------------------------------------------------------------------------------------------------------------------------------------------------------|
| Food and Drug Administration 2009             | Information for Healthcare Professionals - Acute pancreatitis and sitagliptin (marketed as Januvia and Janumet)<br>"FDA is revising the prescribing information for Januvia (sitagliptin) and Janumet (sitagliptin/metformin) to include information on reported cases of acute pancreatitis in patients using these products."<br>"Eighty-eight post-marketing cases of acute pancreatitis, including two cases of hemorrhagic or necrotizing pancreatitis in patients using sitagliptin, were reported to the Agency between October 16, 2006 and February 9, 2009. Based on these reports, FDA is working with the manufacturer of sitagliptin and sitagliptin/metformin to revise the prescribing information..." to include:<br>"Based on the temporal relationship of initiating sitagliptin or sitagliptin/metformin and development of acute pancreatitis in the reviewed cases, FDA believes there may be an association between these events. Because acute pancreatitis is associated with considerable morbidity and mortality, and early recognition is important in reducing adverse health outcomes, FDA is recommending revisions to the prescribing information to alert healthcare professionals to this potentially serious adverse drug event." |
| MERCK<br>Januvia<br>Drug monograph<br>2013    | "There have been reports of acute pancreatitis, including fatal and non-fatal hemorrhagic or necrotizing pancreatitis, in patients taking JANUVIA®. After initiation of JANUVIA®, patients should be observed carefully for signs and symptoms of pancreatitis. If pancreatitis is suspected, JANUVIA® should promptly be discontinued and appropriate management should be initiated. Risk factors for pancreatitis include a history of: pancreatitis, gallstones, alcoholism, or hypertriglyceridemia."                                                                                                                                                                                                                                                                                                                                                                                                                                                                                                                                                                                                                                                                                                                                                          |
| Canadian Diabetes Association Guidelines 2013 | "DPP-4 inhibitor: Sitagliptin (Januvia) Saxagliptin (Onglyza) Linagliptin (Trajenta):<br>Negligible risk of hypoglycemia as monotherapy, weight neutral, Improved postprandial control, rare cases of pancreatitis "                                                                                                                                                                                                                                                                                                                                                                                                                                                                                                                                                                                                                                                                                                                                                                                                                                                                                                                                                                                                                                                |

Harper W, Clement M, Goldenberg R, Hanna A, Main A, Retnakaran R, Sherifali D, Woo V, Yale JF. Canadian Diabetes Association Guidelines - Pharmacologic management of type 2 diabetes. 2013. Available from: <http://guidelines.diabetes.ca/Browse/Chapter13>. Accessed 03/13, 2014.

Januvia Sitagliptin tablets 25mg, 50mg, 100mg. Merck Sharp & Dohme Limited; 2013. Available from: [http://www.merck.ca/assets/en/pdf/products/JANUVIA-PM\\_E.pdf](http://www.merck.ca/assets/en/pdf/products/JANUVIA-PM_E.pdf). Accessed 03/13, 2014.

U.S. Food and Drug Administration. Information for Healthcare Professionals - Acute pancreatitis and sitagliptin (marketed as Januvia and Janumet). 2009. Available at <http://www.fda.gov/Drugs/DrugSafety/PostmarketDrugSafetyInformationforPatientsandProviders/DrugSafetyInformationforHealthcareProfessionals/ucm183764.htm>. Accessed 03/13, 2014.

**eTable 2. Checklist of recommendations for reporting of observational studies using the STROBE guidelines**

|                          | Item No | Recommendation                                                                                                                                                                       | Reported                                   |
|--------------------------|---------|--------------------------------------------------------------------------------------------------------------------------------------------------------------------------------------|--------------------------------------------|
| Title and abstract       | 1       | (a) Indicate the study's design with a commonly used term in the title or the abstract                                                                                               | Abstract                                   |
|                          |         | (b) Provide in the abstract an informative and balanced summary of what was done and what was found                                                                                  | Abstract                                   |
| <b>Introduction</b>      |         |                                                                                                                                                                                      |                                            |
| Background/rationale     | 2       | Explain the scientific background and rationale for the investigation being reported                                                                                                 | Introduction                               |
| Objectives               | 3       | State specific objectives, including any pre-specified hypotheses                                                                                                                    | Introduction                               |
| <b>Methods</b>           |         |                                                                                                                                                                                      |                                            |
| Study design             | 4       | Present key elements of study design early in the paper                                                                                                                              | Methods                                    |
| Setting                  | 5       | Describe the setting, locations, and relevant dates, including periods of recruitment, exposure, follow-up, and data collection                                                      | Methods                                    |
| Participants             | 6       | (a) Give the eligibility criteria, and the sources and methods of selection of participants. Describe methods of follow-up                                                           | Methods                                    |
|                          |         | (b) For matched studies, give matching criteria and number of exposed and unexposed                                                                                                  | Methods                                    |
| Variables                | 7       | Clearly define all outcomes, exposures, predictors, potential confounders, and effect modifiers. Give diagnostic criteria, if applicable                                             | Methods                                    |
| Data sources/measurement | 8       | For each variable of interest, give sources of data and details of methods of assessment (measurement). Describe comparability of assessment methods if there is more than one group | Supplementary Materials eTable 3, 4        |
| Bias                     | 9       | Describe any efforts to address potential sources of bias                                                                                                                            | Discussion                                 |
| Study size               | 10      | Explain how the study size was arrived at                                                                                                                                            | Methods, based on availability of the data |
| Quantitative variables   | 11      | Explain how quantitative variables were handled in the analyses. If applicable, describe which groupings were chosen and why                                                         | Methods                                    |
| Statistical methods      | 12      | (a) Describe all statistical methods, including those used to control for confounding                                                                                                | Methods                                    |
|                          |         | (b) Describe any methods used to examine subgroups and interactions                                                                                                                  | Not Applicable                             |
|                          |         | (c) Explain how missing data were addressed                                                                                                                                          | Not Applicable                             |
|                          |         | (d) If applicable, explain how loss to follow-up was addressed                                                                                                                       | Not Applicable                             |
|                          |         | (e) Describe any sensitivity analyses                                                                                                                                                | Not Applicable                             |

| <b>Results</b>           |    |                                                                                                                                                                                                               |                                                       |
|--------------------------|----|---------------------------------------------------------------------------------------------------------------------------------------------------------------------------------------------------------------|-------------------------------------------------------|
| Participants             | 13 | (a) Report numbers of individuals at each stage of study—e.g. numbers potentially eligible, examined for eligibility, confirmed eligible, included in the study, completing follow-up, and analyzed           | Results, Supplementary Materials eFigure 1, 2         |
|                          |    | (b) Give reasons for non-participation at each stage                                                                                                                                                          | Methods, Supplementary Materials eFigure 1, 2         |
|                          |    | (c) Consider use of a flow diagram                                                                                                                                                                            | Supplementary Materials eFigure 1, 2                  |
| Descriptive data         | 14 | (a) Give characteristics of study participants (e.g. demographic, clinical, social) and information on exposures and potential confounders                                                                    | Results, Table 1, Supplementary Materials eTable 6, 7 |
|                          |    | (b) Indicate number of participants with missing data for each variable of interest                                                                                                                           | Results                                               |
|                          |    | (c) Summarise follow-up time (e.g. average and total amount)                                                                                                                                                  | Results                                               |
| Outcome data             | 15 | Report numbers of outcome events or summary measures over time                                                                                                                                                | Results                                               |
| Main results             | 16 | (a) Give unadjusted estimates and, if applicable, confounder-adjusted estimates and their precision (e.g. 95% confidence interval). Make clear which confounders were adjusted for and why they were included | Results, Table 3                                      |
|                          |    | (b) Report category boundaries when continuous variables were categorized                                                                                                                                     | Table 1, Supplementary Materials eTable 6, 7          |
|                          |    | (c) If relevant, consider translating estimates of relative risk into absolute risk for a meaningful time period                                                                                              | Results, Table 3                                      |
| Other analyses           | 17 | Report other analyses done—e.g. analyses of subgroups and interactions, and sensitivity analyses                                                                                                              | Results                                               |
| <b>Discussion</b>        |    |                                                                                                                                                                                                               |                                                       |
| Key results              | 18 | Summarise key results with reference to study objectives                                                                                                                                                      | Discussion                                            |
| Limitations              | 19 | Discuss limitations of the study, taking into account sources of potential bias or imprecision. Discuss both direction and magnitude of any potential bias                                                    | Discussion                                            |
| Interpretation           | 20 | Give a cautious overall interpretation of results considering objectives, limitations, multiplicity of analyses, results from similar studies, and other relevant evidence                                    | Discussion                                            |
| Generalisability         | 21 | Discuss the generalisability (external validity) of the study results                                                                                                                                         | Discussion                                            |
| <b>Other information</b> |    |                                                                                                                                                                                                               |                                                       |
| Funding                  | 22 | Give the source of funding and the role of the funders for the present study and, if applicable, for the original study on which the present article is based                                                 | Cover page, Disclosures                               |

eTable 3. Coding definitions for demographic and comorbid conditions

| Characteristics/Condition          | Database          | Codes                                                                                                                                                                                           |
|------------------------------------|-------------------|-------------------------------------------------------------------------------------------------------------------------------------------------------------------------------------------------|
| Age                                | RPDB              |                                                                                                                                                                                                 |
| Sex                                | RPDB              |                                                                                                                                                                                                 |
| Socioeconomic Status               | Statistics Canada |                                                                                                                                                                                                 |
| Rural Location                     | Statistics Canada |                                                                                                                                                                                                 |
| Long Term Care Utilization         | ODB               |                                                                                                                                                                                                 |
| Charlson Comorbidity Index         | CIHI-DAD          |                                                                                                                                                                                                 |
| Health Care Visits                 | OHIP<br>IPDB      |                                                                                                                                                                                                 |
| Prescribing Physician              | IPDB              |                                                                                                                                                                                                 |
| Pancreatectomy/Pancreas Transplant | CIHI-DAD<br>OHIP  | CCI: "10A85VCXXK", "10J85", "10J87", "10J89", "10K58", "10K85", "10K87", "10K91", "10J83"<br><br>ICD10: "T8681"<br><br>OHIP FEE: "S297", "S298", "S299", "S300", "S301", "S303", "S308", "S309" |
| Gallstones/Biliary stones          | CIHI-DAD<br>OHIP  | ICD10: "K563", "K800", "K801", "K802", "K803", "K804", "K805"<br><br>OHIP DX: "574"                                                                                                             |
| Calcium disorder                   | CIHI-DAD          | ICD10: "E835"                                                                                                                                                                                   |
| Alcoholism                         | CIHI-DAD          | ICD10: "E512", "F10", "G312", "G621", "G721", "I426", "K292", "K70", "K860", "T510", "X45", "X65", "Y15", "Y573", "Z502", "Z714", "Z721"                                                        |
| Tobacco Use                        | CIHI-DAD<br>OHIP  | ICD10: "F17", "T652", "Z587", "Z716", "Z720", "Z8642"<br>OHIP DX: "305"<br>OHIP Fee: "E079", "K039", "Q041", "Q042", "Q622"                                                                     |
| Pancreatic Neoplasm                | CIHI-DAD<br>OHIP  | ICD10: "C250", "C251", "C252", "C253", "C254", "C257", "C258", "C259"<br><br>OHIP DX: "157"                                                                                                     |
| ERCP                               | CIHI-DAD<br>OHIP  | CCI: "10E50BA", "10E50BAAG", "10E52BATS", "10E54BATS", "10J52BA", "10J52BATS", "30G10WZ"<br><br>OHIP FEE: "E662", "E668", "Z760"                                                                |



|                                         |                  |                                                                                                                                                                                                                |
|-----------------------------------------|------------------|----------------------------------------------------------------------------------------------------------------------------------------------------------------------------------------------------------------|
|                                         |                  |                                                                                                                                                                                                                |
| <b>Chronic Kidney Disease</b>           | CIHI-DAD<br>OHIP | ICD10: "E102", "E112", "E132", "E142",<br>"I12", "I13", "N08", "N18", "N19"<br><br>OHIP DX: "403", "585"                                                                                                       |
| <b>Bile Duct Neoplasm</b>               | CIHI-DAD<br>OHIP | ICD10: "C221", "C240", "C248", "C249",<br>"C787", "D015", "D135", "D376", "81600",<br>"81610", "81613"<br><br>OHIP DX: "156"                                                                                   |
| <b>HIV</b>                              | CIHI-DAD<br>OHIP | ICD10: "B20", "B21", "B22", "B23",<br>"B24", "Z21", "C46"<br><br>OHIP DX: "042", "043", "044"                                                                                                                  |
| <b>Systemic Lupus<br/>Erythematosis</b> | CIHI-DAD<br>OHIP | ICD10: "L93", "M32"<br><br>OHIP DX: "695"                                                                                                                                                                      |
| <b>Polyarteritis Nodosa</b>             | CIHI-DAD<br>OHIP | ICD10: "M300"<br><br>OHIP DX: "446"                                                                                                                                                                            |
| <b>Celiac Disease</b>                   | CIHI-DAD<br>OHIP | ICD10: "K900"<br><br>OHIP DX: "579"                                                                                                                                                                            |
| <b>Obesity</b>                          | CIHI-DAD<br>OHIP | ICD10: "E660", "E661", "E662", "E668",<br>"E669"<br><br>OHIP DX: "278"                                                                                                                                         |
| <b>Charlson Comorbidity<br/>Index</b>   | CIHI-DAD         |                                                                                                                                                                                                                |
| <b>Diabetic Retinopathy</b>             | CIHI-DAD         | ICD10: "E1030", "E1031", "E1032",<br>"E1033", "E1130", "E1131", "E1132",<br>"E1133", "E1330", "E1331", "E1332",<br>"E1333", "E1430", "E1431", "E1432",<br>"E1433", "H360"                                      |
| <b>Diabetic Neuropathy</b>              | CIHI-DAD         | ICD10: "E1040", "E1041", "E1042",<br>"E1048", "E1049", "E1440", "E1441",<br>"E1442", "E1448", "E1140", "E1141",<br>"E1142", "E1148", "E1340", "E1341",<br>"E1342", "E1348", "E1349", "G590",<br>"G632", "G990" |
| <b>Peripheral Vascular<br/>Disease</b>  | CIHI-DAD<br>OHIP | ICD 10: "I700", "I702", "I708", "I709",<br>"I731", "I738", "I739", "K551"<br><br>CCI: "1KA76", "1KA50", "1KE76", "1KG26",<br>"1KG50", "1KG57", "1KG76MI", "1KG87"                                              |

|                                                  |                  |                                                                                                                                                                                                                                                                                                                                                                                                                                                                                                                                                                                                                                                                          |
|--------------------------------------------------|------------------|--------------------------------------------------------------------------------------------------------------------------------------------------------------------------------------------------------------------------------------------------------------------------------------------------------------------------------------------------------------------------------------------------------------------------------------------------------------------------------------------------------------------------------------------------------------------------------------------------------------------------------------------------------------------------|
|                                                  |                  | OHIP fee codes: "R787", "R780", "R797", "R804", "R809", "R875", "R815", "R936", "R783", "R784", "R785", "E626", "R814", "R786", "R937", "R860", "R861", "R855", "R856", "R933", "R934", "R791", "E672", "R794", "R813", "R867", "E649"                                                                                                                                                                                                                                                                                                                                                                                                                                   |
| <b>Heart Failure</b>                             | CIHI-DAD<br>OHIP | ICD10: "I500", "I501", "I509", "I255", "J81"<br><br>CCI: "1HP53", "1HP55", "1HZ53GRFR", "1HZ53LAFR", "1HZ53SYFR"<br><br>OHIP FEE: "R701", "R702", "Z429"<br><br>OHIP DX: "428"                                                                                                                                                                                                                                                                                                                                                                                                                                                                                           |
| <b>Coronary Artery Bypass Graft</b>              | CIHI-DAD<br>OHIP | CCI: 1IJ50, 1IJ76<br><br>CCP: 4802, 4803, 4809, 4811, 4812, 4813, 4814, 4815, 4816, 4817, 4819<br><br>OHIP FEE: Z434, R742, R743                                                                                                                                                                                                                                                                                                                                                                                                                                                                                                                                         |
| <b>Hypertension</b>                              | ODB              |                                                                                                                                                                                                                                                                                                                                                                                                                                                                                                                                                                                                                                                                          |
| <b>Coronary Artery Disease, Excluding Angina</b> | CIHI-DAD         | ICD10: "I21", "I22", "Z955", "T822"<br><br>CCI: "1IJ50", "1IJ76"<br><br>OHIPFee: "R741", "R742", "R743", "G298", "E646", "E651", "E652", "E654", "E655", "Z434", "Z448"<br><br>OHIPDx: "410", "412"                                                                                                                                                                                                                                                                                                                                                                                                                                                                      |
| <b>Myocardial Infarction</b>                     | CIHI-DAD         | ICD9: "410"<br><br>ICD10: "I21", "I22"                                                                                                                                                                                                                                                                                                                                                                                                                                                                                                                                                                                                                                   |
| <b>Stroke/Transient Ischemic Attack</b>          | CIHI-DAD         | ICD10: "I630", "I631", "I632", "I633", "I634", "I635", "I638", "I639", "I64", "H341", "I600", "I601", "I602", "I603", "I604", "I605", "I606", "I607", "I609", "I61", "G450", "G451", "G452", "G453", "G458", "G459"                                                                                                                                                                                                                                                                                                                                                                                                                                                      |
| <b>Dialysis</b>                                  | CIHI-DAD<br>OHIP | ICD10: "T824", "Y602", "Y612", "Y622", "Y841", "Z49", "Z992", "N180", "E1022", "E1023", "E1122", "E1123", "E1322", "E1323", "E1422", "E1423"<br><br>CCI: "1OT53DATS", "1OT53HATS", "1OT53LATS", "1SY55LAFT", "7SC59QD", "1KY76", "1PZ21"<br><br>OHIP FEE: "R850", "G324", "G336", "G327", "G862", "G865", "G099", "R825", "R826", "R827", "R833", "R840", "R841", "R843", "R848", "R851", "Z450", "Z451", "Z452", "G864", "R852", "R853", "R854", "R885", "G333", "H540", "H740", "R849", "G323", "G325", "G326", "G860", "G863", "G866", "G330", "G331", "G332", "G861", "G082", "G083", "G085", "G090", "G091", "G092", "G093", "G094", "G095", "G096", "G294", "G295" |

|                                  |                  |                                                                                                                                                                                                                                      |
|----------------------------------|------------------|--------------------------------------------------------------------------------------------------------------------------------------------------------------------------------------------------------------------------------------|
| Renal Transplant                 | CIHI-DAD<br>OHIP | ICD10: "T861", "N165", "Z940"<br><br>CCI: "1PC85"<br><br>OHIP FEE: "E762", "S435", "E769",<br>"S434", "E771", "Z631", "G347", "G348",<br>"G412", "G408", "                                                                           |
| Hypoglycemic Episode             | CIHI-DAD         | ICD10: "E15", "E160", "E161", "E162",<br>"E1063", "E1163", "E1363", "E1463"                                                                                                                                                          |
| Acute or Chronic<br>Pancreatitis | CIHI-DAD         | ICD 10: "K85", "B252", "B263", "K860",<br>"K861"                                                                                                                                                                                     |
| Hyperglycemic Emergency          | CIHI-DAD         | ICD10: "E1410", "E1412", "E1010",<br>"E1012", "E1110", "E1112", "E1300",<br>"E140"                                                                                                                                                   |
| Glycated Hemoglobin Value        | Gamma Dynacare   |                                                                                                                                                                                                                                      |
| Number of Physician<br>Visits    | OHIP             |                                                                                                                                                                                                                                      |
| Glycated Hemoglobin Tests        | OHIP             | OHIP FEE: "L093"                                                                                                                                                                                                                     |
| Glucose Tests                    | OHIP             | OHIP FEE: "L111", "L112", "G002"                                                                                                                                                                                                     |
| Cholesterol Tests                | OHIP             | OHIP Fee: "G001", "G013", "L117", "Q183"                                                                                                                                                                                             |
| TSH Tests                        | OHIP             | OHIP FEE: "G016", "G399", "L341"                                                                                                                                                                                                     |
| Carotid Ultrasound               | CIHI-DAD<br>OHIP | CCI: "3JE30"<br><br>OHIP FEE: "J201", "J501", "J189",<br>"J489", "J190", "J191", "J490", "J491",<br>"J492"                                                                                                                           |
| Cardiac Catheterization          | CIHI-DAD<br>OHIP | CCI: "3IJ30GP", "3HZ30GP", "2HZ24GPKJ",<br>"2HZ24GPKL", "2HZ24GPKM", "2HZ24GPXJ",<br>"2HZ28GPPL", "2HZ71GP"<br><br>OHIP FEE: "G296", "G297", "G299",<br>"G300", "G301", "G304", "G305", "G306"                                       |
| Coronary<br>Revascularization    | CIHI-DAD<br>OHIP | CCI: "1IJ50", "1IJ26", "1IJ27", "1IJ57",<br>"1IJ76"<br><br>OHIP FEE: "R741", "R742", "R743",<br>"E651", "E652", "E654", "E646", "G298",<br>"Z434", "G262"                                                                            |
| Echocardiography                 | CIHI-DAD<br>OHIP | CCI: "3IP30"<br><br>OHIP FEE: "G560", "G561", "G562",<br>"G566", "G567", "G568", "G570", "G571",<br>"G572", "G574", "G575", "G576", "G577",<br>"G578", "G579", "G580", "G581"                                                        |
| Holter Monitor                   | CIHI-DAD<br>OHIP | CCI: "2HZ24JAKH"<br><br>OHIP FEE: "G650", "G651", "G652",<br>"G653", "G654", "G655", "G656", "G657",<br>"G658", "GG59", "G660", "G661", "G682",<br>"G683", "G684", "G685", "G686", "G687",<br>"G688", "G689", "G690", "G692", "G693" |

|                                          |                  |                                                                                                                                                                                                                                                      |
|------------------------------------------|------------------|------------------------------------------------------------------------------------------------------------------------------------------------------------------------------------------------------------------------------------------------------|
| <b>Cardiac Stress Test</b>               | CIHI-DAD<br>OHIP | CCI: "2HZ08", "3IP70"<br><br>OHIP FEE: "G315", "G174", "G111",<br>"G112", "G319", "J604", "J606", "J607",<br>"J608", "J611", "J612", "J613", "J667",<br>"J807", "J808", "J809", "J804", "J811",<br>"J812", "J813", "J867", "J609", "J666",<br>"J866" |
| <b>Influenza Vaccine</b>                 | OHIP             | OHIP FEE: "G590", "G591"                                                                                                                                                                                                                             |
| <b>Colorectal Cancer Screening</b>       | OHIP             | OHIP FEE: "G004", "L179", "L181",<br>"Q043", "Q152", "X112", "X113", "Z535",<br>"Z536", "Z555", "Z580"                                                                                                                                               |
| <b>Prostate Specific Antigen Testing</b> | OHIP             | OHIP FEE: "L354", "L358"                                                                                                                                                                                                                             |
| <b>Mammography</b>                       | OHIP             | OHIP FEE: "X172", "X178", "X184",<br>"X185", "X201"                                                                                                                                                                                                  |
| <b>Diabetes Management Code</b>          | OHIP             | OHIP FEE: "K030"                                                                                                                                                                                                                                     |
| <b>Diabetes Incentive Code</b>           | OHIP             | OHIP FEE: "Q040"                                                                                                                                                                                                                                     |
| <b>Bone Mineral Density</b>              | OHIP             | OHIP FEE: "J654", "J688", "J854",<br>"J888", "X149", "X152", "X153", "X155",<br>"Y654", "Y688", "Y854", "Y888"                                                                                                                                       |

CCI, Canadian Classification of Health Interventions; CCP, Canadian Classification of Diagnostic, Therapeutic and Surgical Procedures; CIHI, Canadian Institute for Health Information hospital discharge abstract database; ICD-9, International Classification of Disease, Ninth Revision; ICD-10, International Classification of Disease, Tenth Revision; RPDB, Registered Persons Database of Ontario; IPDB, ICES Physician Database.

**eTable 4. Coding definitions for hospital presentation with pancreatitis**

| Condition           | Database | Codes                         |
|---------------------|----------|-------------------------------|
| Acute pancreatitis* | CIHI-DAD | ICD 10: "K85", "B252", "B263" |

\* Using the Swedish National Patient Register, in a cohort of patients in an inpatient setting Razavi et al performed a validation study of acute pancreatitis codes (K85.0, 85.1, 85.2, 85.3, K85.8 and K85.9) using clinical diagnostic criteria (definitive acute pancreatitis if 2 of 3 of: upper abdominal pain, elevated blood levels of amylase, pancreatic amylase or lipase at least three times the upper limit of normal or typical signs of acute pancreatitis on medical imaging; probable acute pancreatitis if combination or clinical signs of acute pancreatitis and enzyme levels elevated but not greater than three times the upper limit of normal or a combination of clinical signs and medical imaging indicating acute pancreatitis). Among 530 patients with a diagnosis code of acute pancreatitis in the registry, 442 (83%) had definitive acute pancreatitis and another 80 (15%) had probable acute pancreatitis. Eight (2%) had no acute pancreatitis. The number of false-negative cases of pancreatitis was 23 (32%) (those registered with a non-malignant pancreatitis disorder apart from acute pancreatitis). The positive predictive value of codes ranged from 83 to 98% if not all formal criteria for acute pancreatitis were fulfilled. See Razavi D, Ljung R, Lu Y, Andren-Sandberg A, Lindblad M. Reliability of acute pancreatitis diagnostic coding in a National Patient Register: a validation study in Sweden. *Pancreatology* 2011; 11: 525-532.

Code B252 (cytomegalovirus pancreatitis) and B263 (mumps pancreatitis) were added to coding definition as both represent acute forms of pancreatitis.

CIHI, Canadian Institute for Health Information Discharge Abstract Database; ICD 10, *International Classification of Disease, Tenth Revision*

1  
2  
3  
4  
5  
6  
7  
8  
9  
10  
11  
12  
13  
14  
15  
16  
17  
18  
19  
20  
21  
22  
23  
24  
25  
26  
27  
28  
29  
30  
31  
32  
33  
34  
35  
36  
37  
38  
39  
40  
41  
42  
43  
44  
45  
46  
47  
48  
49

**eTable 5. Propensity score variables**

|                                                      |
|------------------------------------------------------|
| Demographics                                         |
| Age                                                  |
| Rural location                                       |
| Long term care                                       |
| Prescribing physician of relevant hypoglycemic agent |
| Comorbidities *                                      |
| Chronic kidney disease                               |
| Hypertension                                         |
| Charlson comorbidity index                           |
| Medication use #                                     |
| Diuretic use                                         |
| Lipid lowering drug                                  |
| ACE inhibitor use                                    |
| ARB use                                              |
| Insulin use                                          |
| Gliclazide use                                       |
| Glyburide use                                        |
| Metformin use                                        |
| Rosiglitazone use                                    |
| Health care utilization                              |
| Number of unique drug identifier numbers             |
| Number of unique drug names                          |
| Number of hospitalizations                           |
| Number of emergency room visits                      |
| Number of endocrinologist visits                     |
| Number of nephrologist visits                        |
| Number of glycated hemoglobin tests                  |
| Number of glucose tests                              |
| Number of serum creatinine tests                     |
| Number of thyroid stimulating hormone tests          |
| Flu vaccine                                          |
| Diabetes management code                             |

Confidential

\* Comorbidities were assessed in the previous 5 years  
# Medication use was assessed in the previous 120 days  
|| Health care utilization was assessed in the previous 1 year

eTable 6. Demographics, comorbidities, medications and laboratory data prior to and after propensity weighting in patients initiated on sitagliptin or an alternative hypoglycemic agent.

|                            | Prior to Weighting        |                    |                             | After Weighting #                     |                                 |                             |
|----------------------------|---------------------------|--------------------|-----------------------------|---------------------------------------|---------------------------------|-----------------------------|
|                            | Sitagliptin<br>(n=57 689) | Other<br>n=83 405) | Standardized<br>Difference* | Sitagliptin<br>(Weighted<br>n=57 689) | Other<br>(Weighted<br>n=55 705) | Standardized<br>Difference* |
| Age at Index<br>Date       |                           |                    |                             |                                       |                                 |                             |
| Mean                       | 73.98                     | 75.07              | 17%                         | 73.98                                 | 74.07                           | 2%                          |
| Median                     | 73                        | 74                 |                             | 73                                    | 73                              |                             |
| SD                         | 6.25                      | 6.93               |                             | 6.25                                  | 5.2                             |                             |
| 66-70 years                | 21 105<br>(36.58)         | 26 880<br>(32.23)  | 9%                          | 21 105<br>(36.58)                     | 20 171<br>(36.21)               | 1%                          |
| 71-75 years                | 15 829<br>(27.44)         | 21 282<br>(25.52)  | 4%                          | 15 829<br>(27.44)                     | 15 199<br>(27.28)               | 0%                          |
| 76-80 years                | 11 228<br>(19.46)         | 16 397<br>(19.66)  | 0%                          | 11 228<br>(19.46)                     | 10 661<br>(19.14)               | 1%                          |
| 81-85 years                | 6431<br>(11.15)           | 11 112<br>(13.32)  | 7%                          | 6431<br>(11.15)                       | 6350<br>(11.40)                 | 1%                          |
| 86-90 years                | 2461 (4.27)               | 5828<br>(6.99)     | 12%                         | 2461 (4.27)                           | 2678 (4.81)                     | 3%                          |
| >90                        | 635 (1.10)                | 1906<br>(2.29)     | 9%                          | 635 (1.10)                            | 646 (1.16)                      | 1%                          |
| Female                     | 27 584<br>(47.82)         | 40 312<br>(48.33)  | 1%                          | 27 584<br>(47.82)                     | 26 279<br>(47.18)               | 1%                          |
| Rural location             | 5997<br>(10.40)           | 12 396<br>(14.86)  | 13%                         | 5997<br>(10.40)                       | 6275<br>(11.26)                 | 3%                          |
| Long term care<br>facility | 1446 (2.51)               | 5581<br>(6.69)     | 20%                         | 1446 (2.51)                           | 1594 (2.86)                     | 2%                          |
| Income quintile<br>†       |                           |                    |                             |                                       |                                 |                             |
| Quintile 1                 | 12 582<br>(21.81)         | 18 233<br>(21.86)  | 0%                          | 12 582<br>(21.81)                     | 12 447<br>(22.34)               | 1%                          |
| Quintile 2                 | 13 048<br>(22.62)         | 18 029<br>(21.62)  | 2%                          | 13 048<br>(22.62)                     | 12 134<br>(21.78)               | 2%                          |
| Quintile 3                 | 11 601<br>(20.11)         | 16 572<br>(19.87)  | 1%                          | 11 601<br>(20.11)                     | 11 150<br>(20.02)               | 0%                          |
| Quintile 4                 | 10 860<br>(18.83)         | 16 320<br>(19.57)  | 2%                          | 10 860<br>(18.83)                     | 10 845<br>(19.47)               | 2%                          |
| Quintile 5                 | 9419<br>(16.33)           | 13 878<br>(16.64)  | 1%                          | 9419<br>(16.33)                       | 8894<br>(15.97)                 | 1%                          |
| Missing                    | 179 (0.31)                | 373 (0.45)         | 2%                          | 179 (0.31)                            | 234 (0.42)                      | 2%                          |
| Prescribing Physician      |                           |                    |                             |                                       |                                 |                             |
| Endocrinology              | 4813 (8.34)               | 3042<br>(3.65)     | 20%                         | 4813 (8.34)                           | 5047 (9.06)                     | 3%                          |
| General<br>Practitioner    | 42 925<br>(74.41)         | 66 305<br>(79.50)  | 12%                         | 42 925<br>(74.41)                     | 40 948<br>(73.51)               | 2%                          |
| Internal                   | 2454 (4.25)               | 2281               | 8%                          | 2454 (4.25)                           | 2407 (4.32)                     | 0%                          |

1  
2  
3  
4  
5  
6  
7  
8  
9  
10  
11  
12  
13  
14  
15  
16  
17  
18  
19  
20  
21  
22  
23  
24  
25  
26  
27  
28  
29  
30  
31  
32  
33  
34  
35  
36  
37  
38  
39  
40  
41  
42  
43  
44  
45  
46  
47  
48  
49

|                                     |                |                |    |                |                |    |
|-------------------------------------|----------------|----------------|----|----------------|----------------|----|
| Medicine                            |                | (2.73)         |    |                |                |    |
| Nephrology                          | 342 (0.59)     | 778 (0.93)     | 4% | 342 (0.59)     | 360 (0.65)     | 1% |
| Other                               | 1830 (3.17)    | 2252 (2.70)    | 3% | 1830 (3.17)    | 1727 (3.10)    | 0% |
| Missing                             | 5325 (9.23)    | 8169 (9.79)    | 2% | 5325 (9.23)    | 5216 (9.36)    | 0% |
| Comorbidities                       |                |                |    |                |                |    |
| Gallstones/<br>biliary stones       | 2163 (3.75)    | 3152 (3.78)    | 0% | 2163 (3.75)    | 2059 (3.70)    | 0% |
| Calcium<br>disorder                 | 123 (0.21)     | 273 (0.33)     | 2% | 123 (0.21)     | 154 (0.28)     | 1% |
| Alcoholism                          | 240 (0.42)     | 659 (0.79)     | 5% | 240 (0.42)     | 338 (0.61)     | 3% |
| Tobacco Use                         | 3128 (5.42)    | 4662 (5.59)    | 1% | 3128 (5.42)    | 3222 (5.78)    | 2% |
| Pancreatic<br>neoplasm              | 101 (0.18)     | 250 (0.30)     | 3% | 101 (0.18)     | 178 (0.32)     | 3% |
| ERCP                                | 281 (0.49)     | 561 (0.67)     | 2% | 281 (0.49)     | 334 (0.60)     | 2% |
| Chronic kidney<br>disease           | 6069 (10.52)   | 10321 (12.37)  | 6% | 6069 (10.52)   | 6714 (12.05)   | 5% |
| Bile duct<br>neoplasm               | 118 (0.20)     | 272 (0.33)     | 2% | 118 (0.20)     | 158 (0.28)     | 2% |
| HIV                                 | 50 (0.09)      | 67 (0.08)      | 0% | 50 (0.09)      | 33 (0.06)      | 1% |
| SLE                                 | 739 (1.28)     | 1107 (1.33)    | 0% | 739 (1.28)     | 659 (1.18)     | 1% |
| Polyarteritis<br>nodosa             | 216 (0.37)     | 429 (0.51)     | 2% | 216 (0.37)     | 248 (0.45)     | 1% |
| Celiac disease                      | 78 (0.14)      | 158 (0.19)     | 1% | 78 (0.14)      | 103 (0.18)     | 1% |
| Obesity                             | 4219 (7.31)    | 5468 (6.56)    | 3% | 4219 (7.31)    | 3696 (6.63)    | 3% |
| Charlson<br>comorbidity<br>index \$ |                |                |    |                |                |    |
| Mean                                | 1.13           | 1.22           | 5% | 1.13           | 1.23           | 7% |
| 0-1                                 | 40 624 (70.42) | 57 156 (68.53) | 4% | 40 624 (70.42) | 37 816 (67.89) | 5% |
| 2                                   | 7861 (13.63)   | 10 430 (12.51) | 3% | 7861 (13.63)   | 8053 (14.46)   | 2% |
| >3                                  | 9204 (15.95)   | 15 819 (18.97) | 8% | 9204 (15.95)   | 9836 (17.66)   | 5% |
| Diabetic<br>retinopathy             | 636 (1.10)     | 842 (1.01)     | 1% | 636 (1.10)     | 783 (1.41)     | 3% |
| Diabetic<br>neuropathy              | 576 (1.00)     | 843 (1.01)     | 0% | 576 (1.00)     | 597 (1.07)     | 1% |
| Peripheral<br>vascular<br>disease   | 679 (1.18)     | 1259 (1.51)    | 3% | 679 (1.18)     | 740 (1.33)     | 1% |
| Heart failure                       | 6606 (11.45)   | 11 932 (14.31) | 9% | 6606 (11.45)   | 7068 (12.69)   | 4% |
| Coronary artery<br>bypass graft     | 1766 (3.06)    | 2553 (3.06)    | 0% | 1766 (3.06)    | 1781 (3.20)    | 1% |



|                                           |                   |                   |     |                   |                   |    |
|-------------------------------------------|-------------------|-------------------|-----|-------------------|-------------------|----|
| Hypertension                              | 49 934<br>(86.56) | 64 828<br>(77.73) | 23% | 49 934<br>(86.56) | 48 277<br>(86.67) | 0% |
| Coronary artery disease                   | 16 299<br>(28.25) | 23 740<br>(28.46) | 0%  | 16 299<br>(28.25) | 16 144<br>(28.98) | 2% |
| Myocardial infarction                     | 1243 (2.15)       | 2479<br>(2.97)    | 5%  | 1243 (2.15)       | 1381 (2.48)       | 2% |
| Stroke/TIA                                | 1377 (2.39)       | 3011<br>(3.61)    | 7%  | 1377 (2.39)       | 1535 (2.76)       | 2% |
| Dialysis                                  | 1251 (2.17)       | 2992<br>(3.59)    | 8%  | 1251 (2.17)       | 1545 (2.77)       | 4% |
| Renal transplant                          | 30 (0.05)         | 118 (0.14)        | 3%  | 30 (0.05)         | 62 (0.11)         | 2% |
| Hypoglycemia                              | 770 (1.33)        | 1354<br>(1.62)    | 2%  | 770 (1.33)        | 818 (1.47)        | 1% |
| Pancreatitis                              | 216 (0.37)        | 467 (0.56)        | 3%  | 216 (0.37)        | 267 (0.48)        | 2% |
| Hyperglycemic emergency                   | 117 (0.20)        | 245 (0.29)        | 2%  | 117 (0.20)        | 162 (0.29)        | 2% |
| Medication use prior to the index date ## |                   |                   |     |                   |                   |    |
| Diuretics                                 | 18 516<br>(32.10) | 28 090<br>(33.68) | 3%  | 18 516<br>(32.10) | 18 644<br>(33.47) | 3% |
| Anti-inflammatory                         | 10 816<br>(18.75) | 13 157<br>(15.77) | 8%  | 10 816<br>(18.75) | 10 268<br>(18.43) | 1% |
| Glucocorticoids                           | 11 297<br>(19.58) | 16 121<br>(19.33) | 1%  | 11 297<br>(19.58) | 11 350<br>(20.38) | 2% |
| Sulphonamides                             | 859 (1.49)        | 1647<br>(1.97)    | 4%  | 859 (1.49)        | 1029 (1.85)       | 3% |
| Tetracyclines                             | 85 (0.15)         | 152 (0.18)        | 1%  | 85 (0.15)         | 128 (0.23)        | 2% |
| Lipid lowering drugs                      | 43 829<br>(75.97) | 51 532<br>(61.79) | 31% | 43 829<br>(75.97) | 42 210<br>(75.77) | 0% |
| Estrogen therapy                          | 601 (1.04)        | 886 (1.06)        | 0%  | 601 (1.04)        | 689 (1.24)        | 2% |
| Beta blockers                             | 18 780<br>(32.55) | 25 985<br>(31.16) | 3%  | 18 780<br>(32.55) | 19 343<br>(34.72) | 5% |
| Azathioprine                              | 74 (0.13)         | 139 (0.17)        | 1%  | 74 (0.13)         | 67 (0.12)         | 0% |
| Acetaminophen                             | 2981 (5.17)       | 4455<br>(5.34)    | 1%  | 2981 (5.17)       | 2871 (5.15)       | 0% |
| Methyldopa                                | 92 (0.16)         | 129 (0.15)        | 0%  | 92 (0.16)         | 111 (0.20)        | 1% |
| Tamoxifen                                 | 65 (0.11)         | 84 (0.10)         | 0%  | 65 (0.11)         | 42 (0.08)         | 1% |
| ACE inhibitors                            | 26 098<br>(45.24) | 32 599<br>(39.09) | 12% | 26 098<br>(45.24) | 25 536<br>(45.84) | 1% |
| ARB's                                     | 19 645<br>(34.05) | 21 037<br>(25.22) | 19% | 19 645<br>(34.05) | 18 335<br>(32.91) | 2% |
| Aliskiren                                 | 1394 (2.42)       | 951 (1.14)        | 10% | 1394 (2.42)       | 979 (1.76)        | 5% |
| Codeine                                   | 5667 (9.82)       | 7468<br>(8.95)    | 3%  | 5667 (9.82)       | 5693<br>(10.22)   | 1% |
| Mesalamine                                | 55 (0.10)         | 63 (0.08)         | 1%  | 55 (0.10)         | 43 (0.08)         | 1% |
| Metronidazole                             | 730 (1.27)        | 1129<br>(1.35)    | 1%  | 730 (1.27)        | 774 (1.39)        | 1% |
| Sulindac                                  | 37 (0.06)         | 41 (0.05)         | 1%  | 37 (0.06)         | 28 (0.05)         | 1% |

1  
2  
3  
4  
5  
6  
7  
8  
9  
10  
11  
12  
13  
14  
15  
16  
17  
18  
19  
20  
21  
22  
23  
24  
25  
26  
27  
28  
29  
30  
31  
32  
33  
34  
35  
36  
37  
38  
39  
40  
41  
42  
43  
44  
45  
46  
47  
48  
49

|                                                                                     |                |                |      |                |                |     |
|-------------------------------------------------------------------------------------|----------------|----------------|------|----------------|----------------|-----|
| Valproic Acid                                                                       | 41 (0.07)      | 94 (0.11)      | 1%   | 41 (0.07)      | 53 (0.10)      | 1%  |
| Amiodarone                                                                          | 336 (0.58)     | 639 (0.77)     | 2%   | 336 (0.58)     | 377 (0.68)     | 1%  |
| Lamivudine                                                                          | 12 (0.02)      | 12 (0.01)      | 0%   | 12 (0.02)      | <=5            | --- |
| Omeprazole                                                                          | 2343 (4.06)    | 3519 (4.22)    | 1%   | 2343 (4.06)    | 2639 (4.74)    | 3%  |
| Erythromycin                                                                        | 43 (0.07)      | 54 (0.06)      | 0%   | 43 (0.07)      | 32 (0.06)      | 1%  |
| Hypoglycemic agents prescribed in the 120 days prior to index date **               |                |                |      |                |                |     |
| Insulin                                                                             | 4505 (7.81)    | 3164 (3.79)    | 17%  | 4505 (7.81)    | 4091 (7.34)    | 2%  |
| Gliclazide                                                                          | 17 142 (29.71) | 4566 (5.47)    | 67%  | 17 142 (29.71) | 14 734 (26.45) | 7%  |
| Glyburide                                                                           | 13 807 (23.93) | 12 681 (15.20) | 22%  | 13 807 (23.93) | 14 847 (26.65) | 6%  |
| Metformin                                                                           | 43 135 (74.77) | 20 987 (25.16) | 14%  | 43 135 (74.77) | 41 592 (74.66) | 0%  |
| Pioglitazone                                                                        | 5812 (10.07)   | 1863 (2.23)    | 33%  | 5812 (10.07)   | 5949 (10.68)   | 2%  |
| Repaglinde                                                                          | 341 (0.59)     | 194 (0.23)     | 6%   | 341 (0.59)     | 228 (0.41)     | 3%  |
| Rosiglitazone                                                                       | 2015 (3.49)    | 524 (0.63)     | 20%  | 2015 (3.49)    | 1956 (3.51)    | 0%  |
| Hypoglycemic agents prescribed on the index date ††                                 |                |                |      |                |                |     |
| Insulin                                                                             | 1010 (1.75)    | <=5            | ---  | 1010 (1.75)    | 0              | 19% |
| Gliclazide                                                                          | 6232 (10.80)   | 5578 (6.69)    | 15%  | 6232 (10.80)   | 0              | 49% |
| Glyburide                                                                           | 2982 (5.17)    | 6198 (7.43)    | 9%   | 2982 (5.17)    | 0              | 33% |
| Metformin                                                                           | 14174 (24.57)  | 1324 (1.59)    | 73%  | 14174 (24.57)  | 0              | 81% |
| Pioglitazone                                                                        | 652 (1.13)     | 409 (0.49)     | 7%   | 652 (1.13)     | 771 (1.38)     | 2%  |
| Repaglinde                                                                          | 61 (0.11)      | 27 (0.03)      | 3%   | 61 (0.11)      | 13 (0.02)      | 3%  |
| Rosiglitazone                                                                       | 89 (0.15)      | 51 (0.06)      | 3%   | 89 (0.15)      | 105 (0.19)     | 1%  |
| Hypoglycemic agents prescribed in the 1 year to 120 days prior to the index date §§ |                |                |      |                |                |     |
| Insulin                                                                             | 4671 (8.10)    | 5272 (6.32)    | 37%  | 4671 (8.10)    | 4213 (7.56)    | 2%  |
| Gliclazide                                                                          | 17 175 (29.77) | 5886 (7.06)    | 61%  | 17 175 (29.77) | 14 249 (25.58) | 9%  |
| Glyburide                                                                           | 17 038 (29.53) | 15 101 (18.11) | 27%  | 17 038 (29.53) | 17 053 (30.61) | 2%  |
| Metformin                                                                           | 45 376 (78.66) | 27 777 (33.30) | 103% | 45 376 (78.66) | 41 580 (74.64) | 9%  |
| Pioglitazone                                                                        | 7023 (12.17)   | 2918 (3.50)    | 33%  | 7023 (12.17)   | 6493 (11.66)   | 2%  |
| Repaglinde                                                                          | 450 (0.78)     | 372 (0.45)     | 4%   | 450 (0.78)     | 353 (0.63)     | 2%  |
| Rosiglitazone                                                                       | 2981 (5.17)    | 1123 (1.35)    | 22%  | 2981 (5.17)    | 2447 (4.39)    | 4%  |
| Hemoglobin Alc                                                                      |                |                |      |                |                |     |

|                          |                 |  |                   |                   |    |
|--------------------------|-----------------|--|-------------------|-------------------|----|
| No. with recent test (%) |                 |  | 16 413<br>(28.45) | 14 837<br>(26.63) | 4% |
|                          | Mean            |  | 0.077             | 0.078             | 8% |
|                          | Median          |  | 0.074             | 0.075             |    |
|                          | 25th Percentile |  | 0.069             | 0.069             |    |
|                          | 75th Percentile |  | 0.082             | 0.084             |    |
|                          | SD              |  | 0.013             | 0.012             |    |

Data presented as number (percent) with the exception of age and hemoglobin A1c (presented as mean, median, 25<sup>th</sup> and 75<sup>th</sup> percentile and SD standard deviation).

Abbreviations: ERCP endoscopic retrograde cholangiopancreatography, HIV human immunodeficiency virus, SLE systemic lupus erythematosus, TIA transient ischemic attack, ACE angiotensin converting enzyme inhibitor, ARB angiotensin receptor blocker.

Cell sizes less than six were not reported for reasons of privacy.

# All patients identified prior to weighting were included in the analyses. The number of patients indicated represents a weighted total.

\* Standardized differences are less sensitive to sample size than traditional hypothesis tests. They provide a measure of the difference between groups divided by the pooled standard deviation; a value greater than 10% (0.1) is interpreted as a meaningful difference between the groups.

† Income was categorized into fifths of average neighborhood income on the index date.

§ Charlson Comorbidity Index was calculated using five years of hospitalization data. "No hospitalizations" received a score of 0. See Charlson M, Pompei P, Alex K, Mackenzie C. A new method for classifying prognostic co morbidity in longitudinal studies: development and validation. *J Chron Dis.* 1977; 40: 373-383.

|| Comorbidities were assessed by administrative database codes in the previous five years.

¶ We identified individuals with chronic kidney disease using a validated algorithm of diagnosis and physician claim codes. In Ontario, this algorithm identifies patients with a median estimated glomerular filtration rate (eGFR) of 38 mL/min per 1.73 m<sup>2</sup> (interquartile range 27 to 52). Its absence identifies patients with a median eGFR of 69 mL/min per 1.73 m<sup>2</sup> (interquartile range 56 to 82). See Fleet JL, Dixon SN, Shariff SZ, et al. Detecting chronic kidney disease in population-based administrative databases using an algorithm of hospital encounter and physician claim codes. *BMC Nephrol.* 2013; 14(1):81.

## Baseline medication use was assessed in the previous 120 days.

\*\* Hypoglycemic agent use in the previous 120 days includes hypoglycemic drugs prescribed from -120 to -1 day prior to the index date where days supply covered the index date.

†† Hypoglycemic agent use on the index date refers to hypoglycemic drugs prescribed on the same day as study drug (index date).

\$\$ Hypoglycemic agent use in the previous 365 to 120 days includes those hypoglycemic drugs prescribed from -365 to -120 days prior to the index date.

There were no prescriptions for pentamidine, flucytosine, clomiphene, clozapine, acarbose, acetohexamide, chlorpropramide, glimiperide, nateglinide, tobultamide.

There were fewer than 1% prescriptions for dapsone, isoniazid, procainamide, methimazole, nelfinavir.

1  
2  
3  
4  
5  
6  
7  
8  
9  
10  
11  
12  
13  
14  
15  
16  
17  
18  
19  
20  
21  
22  
23  
24  
25  
26  
27  
28  
29  
30  
31  
32  
33  
34  
35  
36  
37  
38  
39  
40  
41  
42  
43  
44  
45  
46  
47  
48  
49

**eTable 7. Health care utilization prior to and after propensity weighting in patients initiated on sitagliptin or an alternative hypoglycemic agent.**

|                                            | Prior to Weighting     |                  |                          | After Weighting #               |                           |                          |
|--------------------------------------------|------------------------|------------------|--------------------------|---------------------------------|---------------------------|--------------------------|
|                                            | Sitagliptin (n=57 689) | Other (n=83 405) | Standardized Difference* | Sitagliptin (Weighted n=57 689) | Other (Weighted n=55 705) | Standardized Difference* |
| Number of unique drug identifier numbers † |                        |                  |                          |                                 |                           |                          |
| Mean                                       | 10.6                   | 8.97             | 28%                      | 10.6                            | 10.78                     | 4%                       |
| SD                                         | 5.51                   | 6.22             |                          | 5.51                            | 4.67                      |                          |
| Median                                     | 10                     | 8                |                          | 10                              | 10                        |                          |
| 25 <sup>th</sup> Percentile                | 7                      | 5                |                          | 7                               | 7                         |                          |
| 75 <sup>th</sup> Percentile                | 13                     | 15               |                          | 13                              | 14                        |                          |
| 0                                          | 725 (1.26)             | 4957 (5.94)      | 25%                      | 725 (1.26)                      | 775 (1.39)                | 1%                       |
| 1-4                                        | 4632 (8.03)            | 15 092 (18.09)   | 30%                      | 4632 (8.03)                     | 4678 (8.40)               | 1%                       |
| 5-8                                        | 17 181 (29.78)         | 24 599 (29.49)   | 1%                       | 17 181 (29.78)                  | 15 977 (28.68)            | 2%                       |
| 9-12                                       | 17 849 (30.94)         | 19 091 (22.89)   | 18%                      | 17 849 (30.94)                  | 16 536 (29.68)            | 3%                       |
| 12-15                                      | 8001 (13.87)           | 8460 (10.14)     | 11%                      | 8001 (13.87)                    | 8000 (14.36)              | 1%                       |
| >16                                        | 9301 (16.21)           | 11 206 (13.44)   | 8%                       | 9301 (16.12)                    | 9738 (17.48)              | 4%                       |
| Number of unique drug names †              |                        |                  |                          |                                 |                           |                          |
| Mean                                       | 9.56                   | 8                | 32%                      | 9.56                            | 9.69                      | 3%                       |
| SD                                         | 4.65                   | 5.2              |                          | 4.65                            | 3.94                      |                          |
| Median                                     | 9                      | 7                |                          | 9                               | 9                         |                          |
| 25 <sup>th</sup> Percentile                | 6                      | 4                |                          | 6                               | 6                         |                          |
| 75 <sup>th</sup> Percentile                | 12                     | 11               |                          | 12                              | 12                        |                          |
| 0                                          | 725 (1.26)             | 4957 (5.94)      | 25%                      | 725 (1.26)                      | 775 (1.39)                | 1%                       |
| 1-4                                        | 5284 (9.16)            | 16787 (20.13)    | 31%                      | 5284 (9.16)                     | 5363 (9.63)               | 2%                       |
| 5-8                                        | 20 344 (35.26)         | 27 678 (33.19)   | 4%                       | 20 344 (35.26)                  | 18 882 (33.90)            | 3%                       |
| 9-12                                       | 18 377 (31.86)         | 19 284 (23.12)   | 20%                      | 18 377 (31.86)                  | 17 236 (30.94)            | 2%                       |
| 12-15                                      | 7042 (12.21)           | 7641 (9.16)      | 10%                      | 7042 (12.21)                    | 7151 (12.84)              | 2%                       |

|                                             |                   |                   |     |                   |                   |    |
|---------------------------------------------|-------------------|-------------------|-----|-------------------|-------------------|----|
| >16                                         | 5917<br>(10.26)   | 7058 (8.46)       | 6%  | 5917<br>(10.26)   | 6298<br>(11.31)   | 3% |
| Health care use<br>                         |                   |                   |     |                   |                   |    |
| Number of any<br>hospitalization            |                   |                   |     |                   |                   |    |
| Mean                                        | 0.17              | 0.25              | 13% | 0.17              | 0.19              | 4% |
| SD                                          | 0.54              | 0.68              |     | 0.54              | 0.46              |    |
| Median                                      | 0                 | 0                 |     | 0                 | 0                 |    |
| 25th Percentile                             | 0                 | 0                 |     | 0                 | 0                 |    |
| 75th Percentile                             | 0                 | 0                 |     | 0                 | 0                 |    |
| 0                                           | 50 874<br>(88.19) | 69 546<br>(83.38) | 14% | 50 874<br>(88.19) | 48 013<br>(86.19) | 6% |
| 1                                           | 4954 (8.59)       | 9561<br>(11.46)   | 10% | 4954 (8.59)       | 5647<br>(10.14)   | 5% |
| 2                                           | 1270 (2.20)       | 2748 (3.29)       | 7%  | 1270 (2.20)       | 1468<br>(2.64)    | 3% |
| >=3                                         | 591 (1.02)        | 1550 (1.86)       | 7%  | 591 (1.02)        | 577<br>(1.04)     | 0% |
| Number of<br>emergency room<br>visits       |                   |                   |     |                   |                   |    |
| Mean                                        | 0.55              | 0.72              | 12% | 0.55              | 0.6               | 4% |
| SD                                          | 1.28              | 1.5               |     | 1.28              | 1.01              |    |
| Median                                      | 0                 | 0                 |     | 0                 | 0                 |    |
| 25th Percentile                             | 0                 | 0                 |     | 0                 | 0                 |    |
| 75th Percentile                             | 1                 | 1                 |     | 1                 | 1                 |    |
| 0                                           | 40 910<br>(70.91) | 54 459<br>(65.29) | 12% | 40 910<br>(70.91) | 37 731<br>(67.73) | 7% |
| 1                                           | 9734<br>(16.87)   | 15 573<br>(18.67) | 5%  | 9734<br>(16.87)   | 10 372<br>(18.62) | 5% |
| 2                                           | 3700 (6.41)       | 6510 (7.81)       | 5%  | 3700 (6.41)       | 4034<br>(7.24)    | 3% |
| >=3                                         | 3345 (5.80)       | 6863 (8.23)       | 10% | 3345 (5.80)       | 3569<br>(6.41)    | 3% |
| Number of general<br>practitioner<br>visits |                   |                   |     |                   |                   |    |
| Mean                                        | 9.78              | 10.21             | 4%  | 9.78              | 9.8               | 0% |
| SD                                          | 8.38              | 11.87             |     | 8.38              | 7.32              |    |
| Median                                      | 8                 | 7                 |     | 8                 | 8                 |    |
| 25th Percentile                             | 5                 | 4                 |     | 5                 | 5                 |    |
| 75th Percentile                             | 12                | 12                |     | 12                | 12                |    |
| 0                                           | 1218 (2.11)       | 3242 (3.89)       | 10% | 1218 (2.11)       | 1468<br>(2.64)    | 3% |

1  
2  
3  
4  
5  
6  
7  
8  
9  
10  
11  
12  
13  
14  
15  
16  
17  
18  
19  
20  
21  
22  
23  
24  
25  
26  
27  
28  
29  
30  
31  
32  
33  
34  
35  
36  
37  
38  
39  
40  
41  
42  
43  
44  
45  
46  
47  
48  
49

|                                      |                |                |     |                |                |    |
|--------------------------------------|----------------|----------------|-----|----------------|----------------|----|
| 1                                    | 1418 (2.46)    | 3537 (4.24)    | 10% | 1418 (2.46)    | 1560 (2.80)    | 2% |
| 2                                    | 2344 (4.06)    | 4719 (5.66)    | 7%  | 2344 (4.06)    | 2384 (4.28)    | 1% |
| >=3                                  | 52 709 (91.37) | 71 907 (86.21) | 16% | 52 709 (91.37) | 50 293 (90.28) | 4% |
| Number of endocrinologist visits     |                |                |     |                |                |    |
| Mean                                 | 0.32           | 0.22           | 9%  | 0.32           | 0.34           | 2% |
| SD                                   | 1.06           | 1.14           |     | 1.06           | 1              |    |
| Median                               | 0              | 0              |     | 0              | 0              |    |
| 25th Percentile                      | 0              | 0              |     | 0              | 0              |    |
| 75th Percentile                      | 0              | 0              |     | 0              | 0              |    |
| 0                                    | 49 228 (85.33) | 75 945 (91.06) | 18% | 49 228 (85.33) | 47 358 (85.02) | 1% |
| 1                                    | 3398 (5.89)    | 3457 (4.14)    | 8%  | 3398 (5.89)    | 3605 (6.47)    | 2% |
| 2                                    | 2609 (4.52)    | 1911 (2.29)    | 12% | 2609 (4.52)    | 2348 (4.22)    | 2% |
| >=3                                  | 2454 (4.25)    | 2092 (2.51)    | 10% | 2454 (4.25)    | 2393 (4.30)    | 0% |
| Number of nephrologist visits        |                |                |     |                |                |    |
| Mean                                 | 0.23           | 0.51           | 8%  | 0.23           | 0.28           | 3% |
| SD                                   | 2.12           | 4.29           |     | 2.12           | 1.65           |    |
| Median                               | 0              | 0              |     | 0              | 0              |    |
| 25th Percentile                      | 0              | 0              |     | 0              | 0              |    |
| 75th Percentile                      | 0              | 0              |     | 0              | 0              |    |
| 0                                    | 52 827 (91.57) | 75 493 (90.51) | 4%  | 52 827 (91.57) | 50 209 (90.13) | 5% |
| 1                                    | 2393 (4.15)    | 3476 (4.17)    | 0%  | 2393 (4.15)    | 2534 (4.55)    | 2% |
| 2                                    | 1275 (2.21)    | 1892 (2.27)    | 0%  | 1275 (2.21)    | 1490 (2.67)    | 3% |
| 3                                    | 1194 (2.07)    | 2544 (3.05)    | 6%  | 1194 (2.07)    | 1472 (2.64)    | 4% |
| Number of gastro-enterologist visits |                |                |     |                |                |    |
| Mean                                 | 0.19           | 0.23           | 4%  | 0.19           | 0.23           | 4% |
| SD                                   | 0.96           | 1.28           |     | 0.96           | 0.86           |    |
| Median                               | 0              | 0              |     | 0              | 0              |    |
| 25th Percentile                      | 0              | 1              |     | 0              | 0              |    |

|                                        |                   |                   |     |                   |                   |    |
|----------------------------------------|-------------------|-------------------|-----|-------------------|-------------------|----|
| 75th Percentile                        | 0                 | 0                 |     | 0                 | 0                 |    |
| 0                                      | 52 637<br>(91.24) | 75 695<br>(90.76) | 2%  | 52 637<br>(91.24) | 50 171<br>(90.07) | 4% |
| 1                                      | 2438 (4.23)       | 3628 (4.35)       | 1%  | 2438 (4.23)       | 2598<br>(4.66)    | 2% |
| 2                                      | 1291 (2.24)       | 1828 (2.19)       | 0%  | 1291 (2.24)       | 1363<br>(2.45)    | 1% |
| 3                                      | 1323 (2.29)       | 2254 (2.70)       | 3%  | 1323 (2.29)       | 1573<br>(2.82)    | 3% |
| Number of<br>ophthalmologist<br>visits |                   |                   |     |                   |                   |    |
| Mean                                   | 1.08              | 0.92              | 7%  | 1.08              | 1.1               | 1% |
| SD                                     | 2.3               | 2.13              |     | 2.3               | 1.91              |    |
| Median                                 | 0                 | 0                 |     | 0                 | 0                 |    |
| 25th Percentile                        | 0                 | 0                 |     | 0                 | 0                 |    |
| 75th Percentile                        | 1                 | 1                 |     | 1                 | 1                 |    |
| 0                                      | 36 786<br>(63.77) | 57 776<br>(69.27) | 12% | 36 786<br>(63.77) | 35 506<br>(63.74) | 0% |
| 1                                      | 8735<br>(15.14)   | 10626<br>(12.74)  | 7%  | 8735<br>(15.14)   | 8527<br>(15.31)   | 0% |
| 2                                      | 4367 (7.57)       | 5282 (6.33)       | 5%  | 4367 (7.57)       | 4022<br>(7.22)    | 1% |
| 3                                      | 7801<br>(13.52)   | 9721<br>(11.66)   | 6%  | 7801<br>(13.52)   | 7650<br>(13.73)   | 1% |
| Number of<br>internist visits          |                   |                   |     |                   |                   |    |
| Mean                                   | 0.88              | 1.09              | 7%  | 0.88              | 0.94              | 2% |
| SD                                     | 2.65              | 3.62              |     | 2.65              | 2.4               |    |
| Median                                 | 0                 | 0                 |     | 0                 | 0                 |    |
| 25th Percentile                        | 0                 | 0                 |     | 0                 | 0                 |    |
| 75th Percentile                        | 1                 | 1                 |     | 1                 | 1                 |    |
| 0                                      | 41 733<br>(72.34) | 60 445<br>(72.47) | 0%  | 41 733<br>(72.34) | 40 129<br>(72.04) | 1% |
| 1                                      | 6926<br>(12.01)   | 9728<br>(11.66)   | 1%  | 6926<br>(12.01)   | 6882<br>(12.35)   | 1% |
| 2                                      | 3116 (5.40)       | 4098 (4.91)       | 2%  | 3116 (5.40)       | 2927<br>(5.25)    | 1% |
| 3                                      | 5914<br>(10.25)   | 9134<br>(10.95)   | 2%  | 5914<br>(10.25)   | 5768<br>(10.35)   | 0% |
| Number of HbA1c<br>tests               |                   |                   |     |                   |                   |    |
| Mean                                   | 10.48             | 7.8               | 43% | 10.48             | 10.7              | 4% |
| SD                                     | 6.34              | 6.06              |     | 6.34              | 5.51              |    |
| Median                                 | 10                | 7                 |     | 10                | 10                |    |

1  
2  
3  
4  
5  
6  
7  
8  
9  
10  
11  
12  
13  
14  
15  
16  
17  
18  
19  
20  
21  
22  
23  
24  
25  
26  
27  
28  
29  
30  
31  
32  
33  
34  
35  
36  
37  
38  
39  
40  
41  
42  
43  
44  
45  
46  
47  
48  
49

|                            |                |                |     |                |                |    |
|----------------------------|----------------|----------------|-----|----------------|----------------|----|
| 0                          | 1368 (2.37)    | 5927 (7.11)    | 22% | 1368 (2.37)    | 1686 (3.03)    | 4% |
| 1-2                        | 3349 (5.81)    | 12 197 (14.62) | 29% | 3349 (5.81)    | 3316 (5.95)    | 1% |
| 3-4                        | 5043 (8.74)    | 11688 (14.01)  | 17% | 5043 (8.74)    | 4797 (8.61)    | 0% |
| >4                         | 47 929 (83.08) | 53 593 (64.26) | 44% | 47 929 (83.08) | 45 907 (82.41) | 2% |
| Number of glucose tests    |                |                |     |                |                |    |
| Mean                       | 12.36          | 9.6            | 30% | 12.36          | 12.38          | 0% |
| SD                         | 9.78           | 8.36           |     | 9.78           | 8.2            |    |
| Median                     | 11             | 8              |     | 11             | 11             |    |
| 0                          | 1282 (2.22)    | 4416 (5.29)    | 16% | 1282 (2.22)    | 1620 (2.91)    | 4% |
| 1-2                        | 2753 (4.77)    | 7631 (9.15)    | 17% | 2753 (4.77)    | 2693 (4.83)    | 0% |
| 3-4                        | 4315 (7.48)    | 9819 (11.77)   | 15% | 4315 (7.48)    | 4229 (7.59)    | 0% |
| >4                         | 49 339 (85.53) | 61 539 (73.78) | 29% | 49 339 (85.53) | 47 163 (84.67) | 2% |
| Number of creatinine tests |                |                |     |                |                |    |
| Mean                       | 10.54          | 9              | 21% | 10.54          | 10.73          | 3% |
| SD                         | 7.24           | 7.63           |     | 7.24           | 6.19           |    |
| Median                     | 9              | 7              |     | 9              | 9              |    |
| 0                          | 1178 (2.04)    | 4165 (4.99)    | 16% | 1178 (2.04)    | 1420 (2.55)    | 3% |
| 1-2                        | 2847 (4.94)    | 8060 (9.66)    | 18% | 2847 (4.94)    | 2737 (4.91)    | 0% |
| 3-4                        | 5377 (9.32)    | 11 099 (13.31) | 13% | 5377 (9.32)    | 5192 (9.32)    | 0% |
| >4                         | 48 287 (83.70) | 60 081 (72.04) | 28% | 48 287 (83.70) | 46 355 (83.22) | 1% |
| Number of lipid tests      |                |                |     |                |                |    |
| Mean                       | 7.43           | 5.84           | 35% | 7.43           | 7.24           | 4% |
| SD                         | 4.75           | 4.3            |     | 4.75           | 3.93           |    |
| Median                     | 7              | 5              |     | 7              | 6              |    |
| 0                          | 1847 (3.20)    | 6504 (7.80)    | 20% | 1847 (3.20)    | 2237 (4.02)    | 4% |
| 1-2                        | 5128 (8.89)    | 13 137 (15.75) | 21% | 5128 (8.89)    | 5162 (9.27)    | 1% |
| 3-4                        | 50 714 (87.91) | 63 764 (76.45) | 30% | 50 714 (87.91) | 48 306 (86.72) | 4% |
| Number of TSH tests        |                |                |     |                |                |    |
| Mean                       | 4.82           | 4.18           | 17% | 4.82           | 4.77           | 1% |



|                                   |                   |                   |     |                   |                   |    |
|-----------------------------------|-------------------|-------------------|-----|-------------------|-------------------|----|
| SD                                | 3.88              | 3.65              |     | 3.88              | 3.34              |    |
| Median                            | 4                 | 3                 |     | 4                 | 4                 |    |
| 0                                 | 4781 (8.29)       | 10 033<br>(12.03) | 12% | 4781 (8.29)       | 5236<br>(9.40)    | 4% |
| 1-2                               | 12 462<br>(21.60) | 21 610<br>(25.91) | 10% | 12 462<br>(21.60) | 12 482<br>(22.41) | 2% |
| 3-4                               | 40 446<br>(70.11) | 51 762<br>(62.06) | 17% | 40 446<br>(70.11) | 37 986<br>(68.19) | 4% |
| Carotid<br>ultrasound             | 9358<br>(16.22)   | 13 505<br>(16.19) | 0%  | 9358<br>(16.22)   | 9472<br>(17.00)   | 2% |
| Cardiac<br>catheterization        | 5037 (8.73)       | 6909 (8.28)       | 2%  | 5037 (8.73)       | 5065<br>(9.09)    | 1% |
| Coronary<br>revascularization     | 3000 (5.20)       | 4280 (5.13)       | 0%  | 3000 (5.20)       | 3068<br>(5.51)    | 1% |
| Echocardiography                  | 27 738<br>(48.08) | 38 656<br>(46.35) | 3%  | 27 738<br>(48.08) | 26 551<br>(47.66) | 1% |
| Holter monitoring                 | 11 059<br>(19.17) | 15 445<br>(18.52) | 2%  | 11 059<br>(19.17) | 10 490<br>(18.83) | 1% |
| Cardiac stress<br>test            | 23 137<br>(40.11) | 30 200<br>(36.21) | 8%  | 23 137<br>(40.11) | 22 232<br>(39.91) | 0% |
| Influenza vaccine                 | 46 035<br>(79.80) | 61 324<br>(73.53) | 15% | 46 035<br>(79.80) | 44 662<br>(80.18) | 1% |
| Colorectal cancer<br>screening    | 36 721<br>(63.65) | 48 271<br>(57.88) | 12% | 36 721<br>(63.65) | 35 512<br>(63.75) | 0% |
| Prostate specific<br>antigen test | 7875<br>(13.65)   | 10 403<br>(12.47) | 3%  | 7875<br>(13.65)   | 7279<br>(13.07)   | 2% |
| Mammography                       | 10 204<br>(17.69) | 13 221<br>(15.85) | 5%  | 10 204<br>(17.69) | 9369<br>(16.82)   | 2% |
| Diabetes<br>management §          | 31 928<br>(55.35) | 36 713<br>(44.02) | 23% | 31 928<br>(55.35) | 31 902<br>(57.27) | 4% |
| Diabetes<br>incentive ¶           | 31 057<br>(53.84) | 35 608<br>(42.69) | 22% | 31 057<br>(53.84) | 30 491<br>(54.74) | 2% |
| Bone mineral<br>density test      | 17 129<br>(29.69) | 22 387<br>(26.84) | 6%  | 17 129<br>(29.69) | 15 681<br>(28.15) | 3% |

Data presented as number (percent) with the exception of number of investigations and health care visits (presented as mean, median, 25<sup>th</sup> percentile, 75<sup>th</sup> percentile, SD standard deviation).

Abbreviations: TSH thyroid stimulating hormone.

Cell sizes less than six were not reported for reasons of privacy.

#All patients identified prior to weighting were included in the analyses. The number of patients indicated represents a weighted total.

\*Standardized differences are less sensitive to sample size than traditional hypothesis tests. They provide a measure of the difference between groups divided by the pooled standard deviation; a value greater than 10% (0.1) is interpreted as a meaningful difference between the groups.

†Prescribed medication use was assessed in the 120 days prior to the index date.

‡Health care use was assessed in the 1 year previous.

§Diabetes management is an all-inclusive service payable to the most responsible physician for providing continuing management and support of a diabetic patient. The service must include assessments focusing on diabetic target organ systems, relevant counseling and maintenance of a diabetic flow sheet retained on the patient's permanent medical record. The flow sheet must track lipids, cholesterol, HbA1C, urinalysis, blood pressure, fundal examination, peripheral vascular examination, weight, BMI and medication dosage. See Schedule of benefits for physician services under the health insurance act - consultations and visits. A1-128. Available from: [http://www.health.gov.on.ca/english/providers/program/ohip/sob/\\_physerv/a\\_consul.pdf](http://www.health.gov.on.ca/english/providers/program/ohip/sob/_physerv/a_consul.pdf). Accessed 12/30, 2013.

¶Diabetes management incentive is a fee rendered to a general practitioner providing ongoing management of a diabetic patient consistent with the requirements of the Canadian Diabetes Association including a minimum of lipid, HbA1C, blood pressure, BMI measurement, albumin:creatinine, preventative measures and health promotion, referral for dilated eye exam, foot and neurological exam over the

1  
2  
3  
4  
5  
6  
7  
8  
9  
10  
11  
12  
13  
14  
15  
16  
17  
18  
19  
20  
21  
22  
23  
24  
25  
26  
27  
28  
29  
30  
31  
32  
33  
34  
35  
36  
37  
38  
39  
40  
41  
42  
43  
44  
45  
46  
47  
48  
49

previous 12 months. See Schedule of benefits for physician services under the health insurance act - consultations and visits. A1-128.  
Available from: [http://www.health.gov.on.ca/english/providers/program/ohip/sob /physserv/a\\_consul.pdf](http://www.health.gov.on.ca/english/providers/program/ohip/sob /physserv/a_consul.pdf). Accessed 12/30, 2013.

Confidential

eTable 8. Time to event analysis

| Censoring events                                | Sitagliptin<br>Weighted n=57 689<br>14 988 person years of follow-up<br>Median (IQR) days of follow-up, 65 (30, 125) | Other<br>Weighted n=55 705<br>16 972 person years of follow-up<br>Median (IQR) days of follow-up, 75 (30, 129) |
|-------------------------------------------------|----------------------------------------------------------------------------------------------------------------------|----------------------------------------------------------------------------------------------------------------|
| Hospital encounters with pancreatitis           | 260 (0.45%)                                                                                                          | 224 (0.4%)                                                                                                     |
| Hazard ratio (95% CI)                           | 1.18 (0.94 to 1.49)                                                                                                  | 1.00 (reference)                                                                                               |
| Event rate per 1000 person years                | 17.35                                                                                                                | 13.18                                                                                                          |
| Censoring events                                |                                                                                                                      |                                                                                                                |
| Death                                           | 9 (0.02%)                                                                                                            | 20.95 (0.04%)                                                                                                  |
| Study hypoglycemic agent discontinued           | 8579 (14.87%)                                                                                                        | 17485 (31.39%)                                                                                                 |
| Prescription for a non-study hypoglycemic agent | 48 841 (84.66%)                                                                                                      | 37 976 (68.17%)                                                                                                |

1  
2  
3  
4  
5  
6  
7  
8  
9  
10  
11  
12  
13  
14  
15  
16  
17  
18  
19  
20  
21  
22  
23  
24  
25  
26  
27  
28  
29  
30  
31  
32  
33  
34  
35  
36  
37  
38  
39  
40  
41  
42  
43  
44  
45  
46  
47  
48  
49  
50  
51  
52  
53  
54  
55  
56  
57  
58  
59  
60

**eFigure 1. Flow diagram representing sitagliptin cohort inclusions and exclusions**

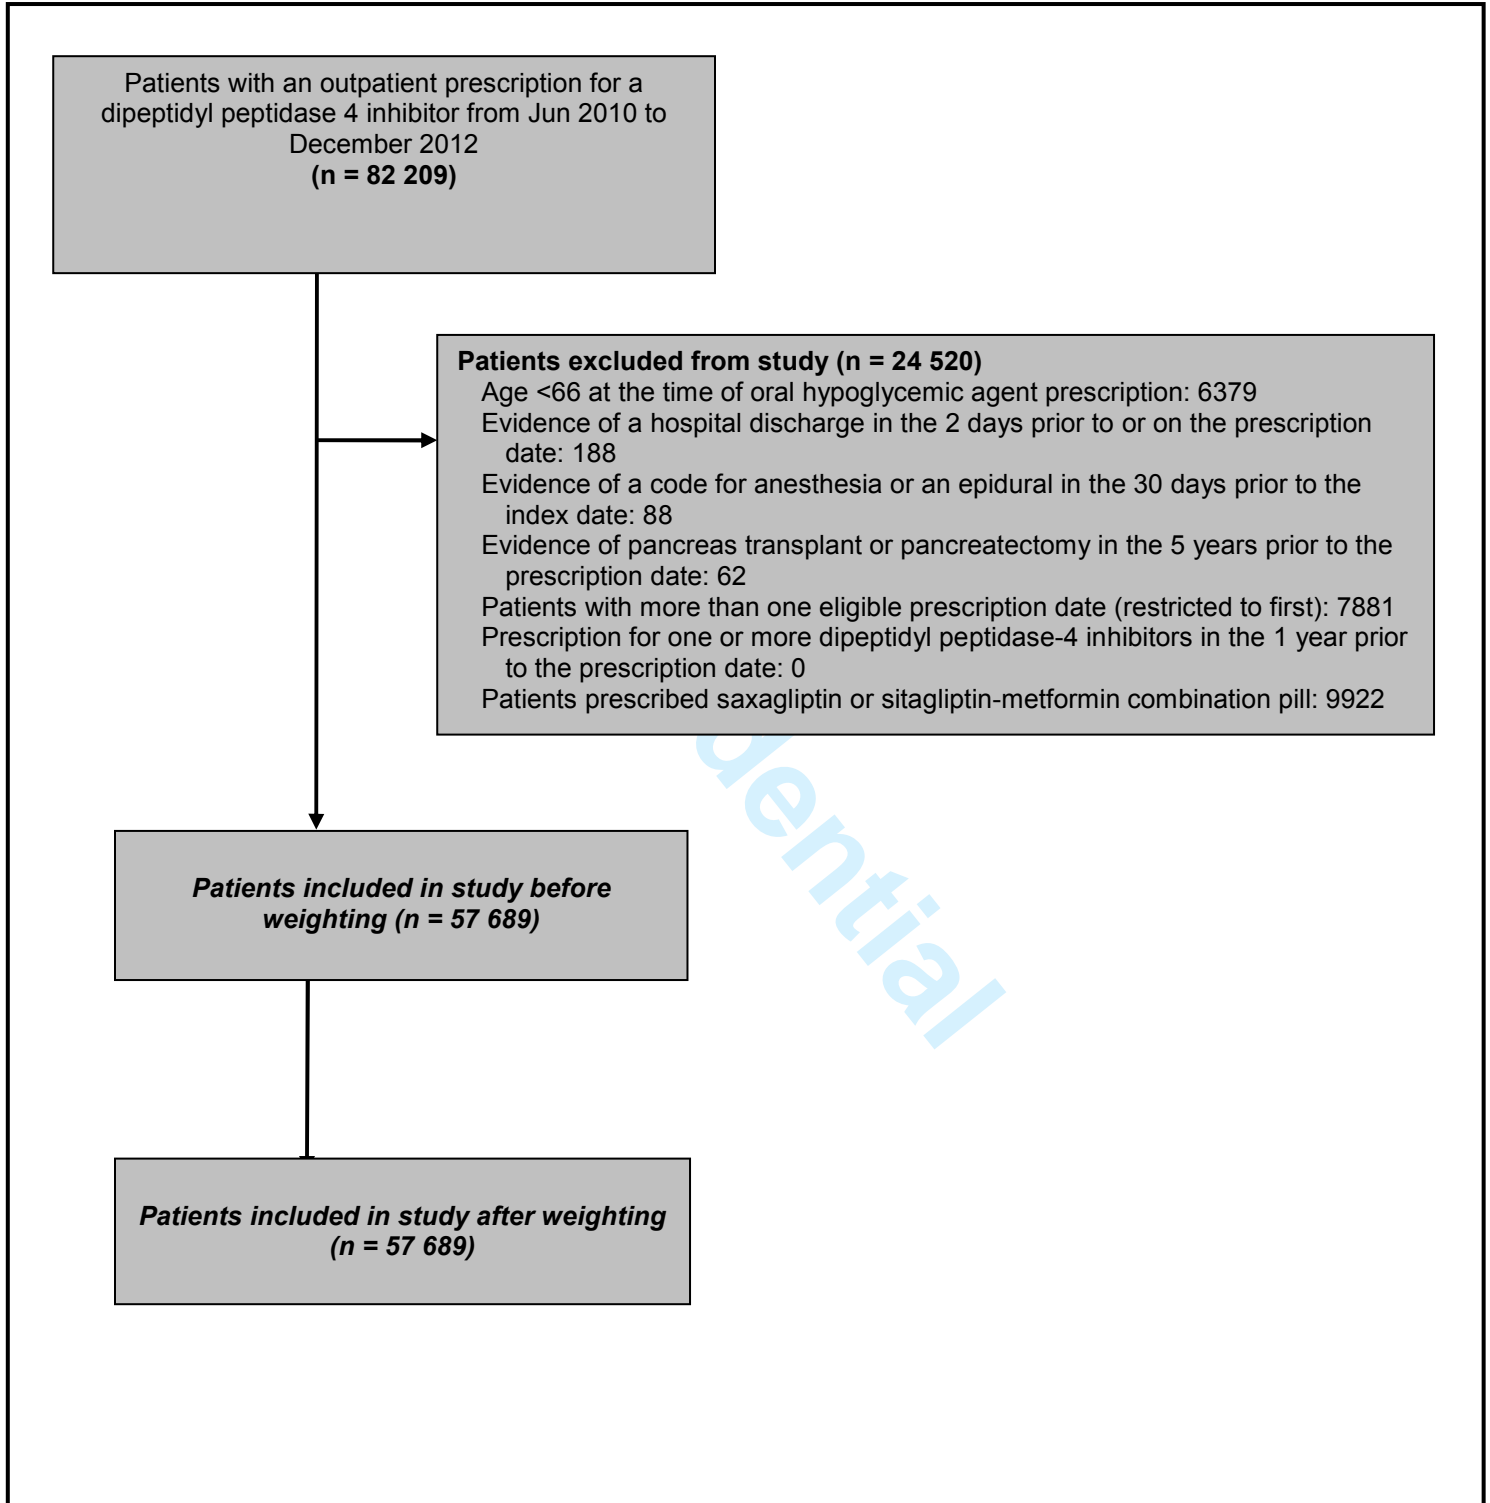

eFigure 2. Flow diagram representing alternative hypoglycemic agent cohort inclusions and exclusions

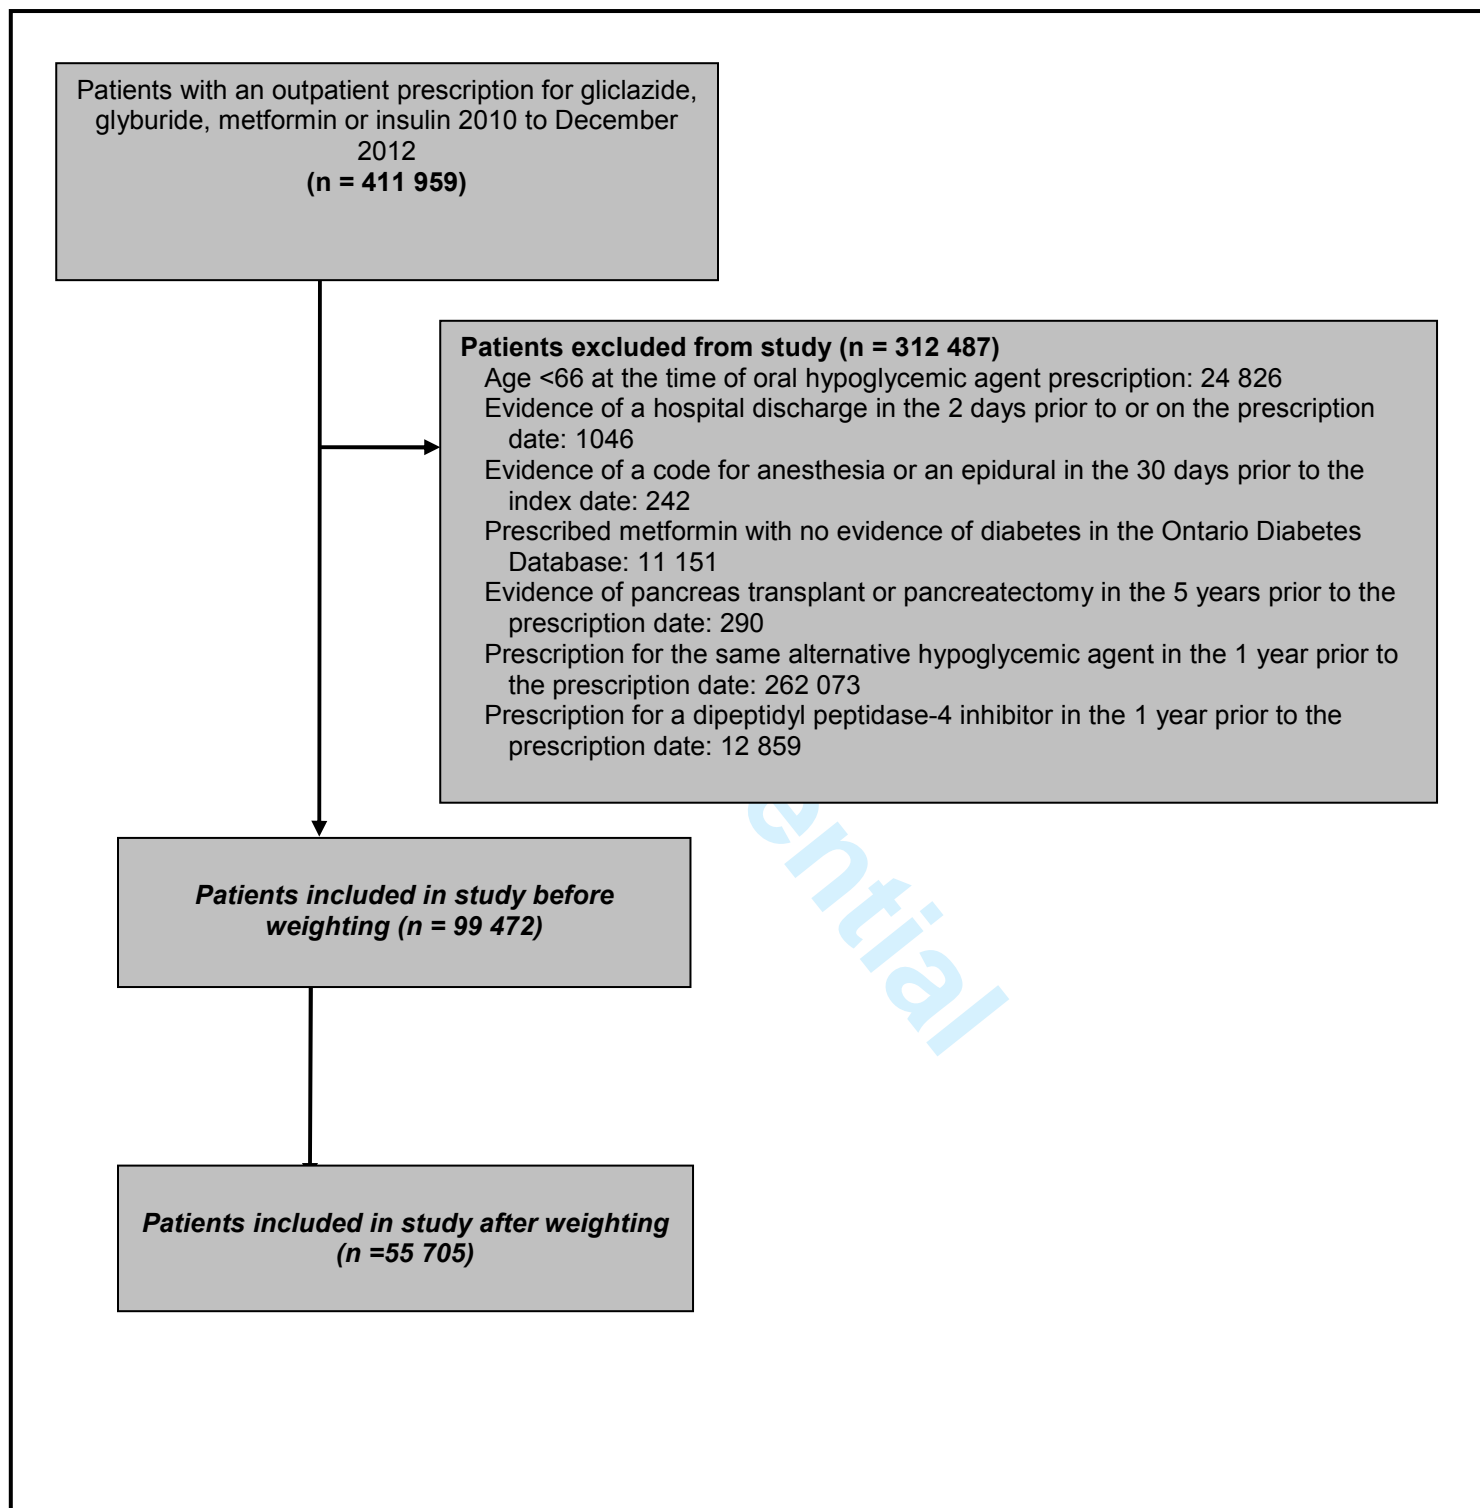

1  
2  
3  
4  
5  
6  
7  
8  
9  
10  
11  
12  
13  
14  
15  
16  
17  
18  
19  
20  
21  
22  
23  
24  
25  
26  
27  
28  
29  
30  
31  
32  
33  
34  
35  
36  
37  
38  
39  
40  
41  
42  
43  
44  
45  
46  
47  
48  
49  
50  
51  
52  
53  
54  
55  
56  
57  
58  
59  
60

Confidential
